# Supplementary material for: Three Prognostic Biomarkers Correlate with Immune Checkpoint Blockade Response in Bladder Urothelial Carcinoma
Source: Hindawi journal article supplement (doi:10.1155/2022/3342666), 2022-05-26
Supplement: f1 [file 3342666.f1.zip]

## Supplementary 2 Different expression genes from Oncomine database

| Gene symbol | Gene symbol | Gene symbol |
|-------------|-------------|-------------|
| AADAC       | FCER1G      | PLCB1       |
| AAK1        | FCGR1A      | PLCB4       |
| ABCB5       | FCGR2A      | PLCG1       |
| ABCC5       | FCGR2B      | PLCXD2      |
| ABCF3       | FCGR2C      | PLD1        |
| ABCG5       | FCGR3A      | PLEK        |
| ABCG8       | FCGR3B      | PLEKHF2     |
| ABHD1       | FCRL1       | PLEKHH2     |
| ABHD12      | FCRL2       | PLEKHO1     |
| ABI1        | FCRL3       | PLGLB1      |
| ABI3BP      | FCRL4       | PLGLB2      |
| ABRA        | FCRL5       | PLK1S1      |
| ACAP2       | FCRL6       | PLTP        |
| ACBD5       | FCRLA       | PLUNC       |
| ACOT8       | FCRLB       | PLXDC2      |
| ACP1        | FDPS        | PMEPA1      |
| ACSS1       | FERD3L      | PMF1        |
| ACSS2       | FERMT1      | PMVK        |
| ACTB        | FETUB       | PNO1        |
| ACTG1       | FEZ2        | PNPT1       |
| ACTG2       | FGF12       | POFUT1      |
| ACTL6A      | FIGLA       | POGK        |
| ACTR2       | FILIP1L     | POGZ        |
| ACTR5       | FITM2       | POLE4       |
| ACYP2       | FKBP1A      | POLR2H      |
| ADA         | FKBP1B      | POLR2K      |
| ADAM15      | FKBP9       | POLR3F      |
| ADAM17      | FLAD1       | POMC        |
| ADAM33      | FLG         | POP1        |
| ADAMTS4     | FLG2        | POTEG       |
| ADAMTSL4    | FLJ25363    | POU2F1      |
| ADAR        | FLJ45079    | POU6F2      |
| ADCY10      | FLRT3       | PPFIA1      |
| ADCY3       | FN3K        | PPIAL4A     |
| ADCYAP1R1   | FN3KRP      | PPIAL4E     |
| ADD2        | FNDC3B      | PPM1B       |
| ADI1        | FNDC4       | PPM1G       |
| ADIG        | FOSL2       | PPOX        |
| ADIPOQ      | FOXA2       | PPP1CB      |
| ADNP        | FOXK2       | PPP1R16B    |
| ADRA1D      | FOXN2       | PPP1R2      |

|          |         |           |
|----------|---------|-----------|
| AFMID    | FOXS1   | PPP1R3D   |
| AFTPH    | FSCN1   | PPP3R1    |
| AGBL5    | FSCN2   | PQLC3     |
| AGR3     | FSHR    | PRCC      |
| AHCY     | FXR1    | PREB      |
| AHR      | FYTTD1  | PREPL     |
| AHSA2    | FZD6    | PREX1     |
| AHSG     | GABPB2  | PRKCE     |
| AIM2     | GABRR3  | PRKCI     |
| AIMP2    | GAD2    | PRND      |
| ALCAM    | GALM    | PRNP      |
| ALDH9A1  | GALNT14 | PROCR     |
| ALG3     | GATAD2B | PROKR1    |
| ALK      | GBA     | PROKR2    |
| ALLC     | GCKR    | PROS1     |
| ALMS1    | GCNT7   | ProSAPiP1 |
| ALOX5AP  | GDAP1L1 | PRPF3     |
| AMPH     | GDF5    | PRPS1L1   |
| AMZ1     | GDF7    | PRPSAP1   |
| ANAPC11  | GEM     | PRTFDC1   |
| ANGPT1   | GEMIN6  | PRUNE     |
| ANGPT4   | GEN1    | PSMB4     |
| ANKMY2   | GET4    | PSMD2     |
| ANKRD26  | GFPT1   | PSMD4     |
| ANKRD30A | GFRA4   | PSME4     |
| ANKRD46  | GGT7    | PSMF1     |
| ANKRD5   | GGTLC1  | PSMG3     |
| ANKRD53  | GHRH    | PTCHD3    |
| ANP32E   | GHRHR   | PTDSS1    |
| ANTXR1   | GHSR    | PTF1A     |
| ANXA4    | GIN51   | PTGIS     |
| ANXA9    | GKN1    | PTPN1     |
| AOAH     | GKN2    | PTPRA     |
| AP2M1    | GLCCI1  | PTPRT     |
| APBB1IP  | GMCL1   | PUM2      |
| APCDD1L  | GNA12   | PUS10     |
| APCS     | GNAS    | PVRL3     |
| APEX2    | GNB4    | PVRL4     |
| APH1A    | GNRH2   | PXMP4     |
| APLF     | GOLPH3L | PYCR1     |
| APOA1BP  | GON4L   | PYDC2     |
| APOA2    | GPA33   | PYGB      |
| APOB     | GPATCH4 | PYGO2     |
| AQP1     | GPCPD1  | PYHIN1    |

|          |           |           |
|----------|-----------|-----------|
| AQP10    | GPN1      | R3HDML    |
| ARFGEF2  | GPNMB     | RAB10     |
| ARHGAP12 | GPR113    | RAB11FIP5 |
| ARHGAP21 | GPR15     | RAB13     |
| ARHGAP25 | GPR158    | RAB18     |
| ARHGAP30 | GPR160    | RAB1A     |
| ARHGDIA  | GPR161    | RAB22A    |
| ARHGEF11 | GPR75     | RAB25     |
| ARHGEF2  | GPS1      | RAB40B    |
| ARHGEF33 | GREB1     | RAC1      |
| ARL13B   | GRHL1     | RAC3      |
| ARL16    | GRHL2     | RAD21L1   |
| ARL5B    | GRID2IP   | RAD51AP2  |
| ARL6     | GSS       | RAD54B    |
| ARL8B    | GTF2A1L   | RADIL     |
| ARMC3    | GTSF1L    | RAE1      |
| ARMC4    | GUCA1C    | RAG1AP1   |
| ARNT     | GZF1      | RALGAPA2  |
| ARPM1    | HAAO      | RALGAPB   |
| ASAP2    | HADHA     | RALY      |
| ASB3     | HADHB     | RAPGEF5   |
| ASH1L    | HAO1      | RASGRP3   |
| ASIP     | HAPLN2    | RASSF2    |
| ASPRV1   | HAX1      | RBAK      |
| ASPSR1   | HCK       | RBBP9     |
| ASXL1    | HCN3      | RBCK1     |
| ASXL2    | HDAC9     | RBKS      |
| ATAD2B   | HDGF      | RBL1      |
| ATF6     | HEATR2    | RBM12     |
| ATL2     | HEATR5B   | RBM12B    |
| ATP11B   | HEPACAM2  | RBM38     |
| ATP1A2   | HEXDC     | RBM39     |
| ATP1A4   | HGS       | RBPJL     |
| ATP1B1   | HHLA2     | RCSD1     |
| ATP5E    | HIBADH    | RDH14     |
| ATP6V1B1 | HIST2H2AB | REG1A     |
| ATP6V1C1 | HIST2H2AC | REG1B     |
| ATP6V1C2 | HIST2H2BE | REG3A     |
| ATP6V1E2 | HK2       | REG3G     |
| ATP8B2   | HM13      | REL       |
| ATP9A    | HMGB1     | REM1      |
| ATRN     | HMGB1L1   | RETNLB    |
| AUP1     | HNF4A     | RFC4      |
| AURKA    | HNRNPA2B1 | RFNG      |

|           |         |          |
|-----------|---------|----------|
| AVP       | HNRPLL  | RFX5     |
| AZI1      | HORMAD1 | RG9MTD1  |
| AZIN1     | HOXA10  | RGPD1    |
| B3GALT1   | HOXA11  | RGPD2    |
| B3GNT2    | HOXA13  | RGS22    |
| B3GNT5    | HOXA3   | RGS4     |
| B4GALT3   | HOXA7   | RGS5     |
| B4GALT5   | HOXA9   | RHBG     |
| BAALC     | HPCAL1  | RHOB     |
| BAHCC1    | HRG     | RHOQ     |
| BAMBI     | HRNBP3  | RIMS2    |
| BANF2     | HRNR    | RIMS4    |
| BBS9      | HRSP12  | RIN2     |
| BBX       | HS1BP3  | RIPK2    |
| BCAN      | HSD17B7 | RIT1     |
| BCAS1     | HSPA12B | RNASEH1  |
| BCAS4     | HSPA6   | RNF114   |
| BCL11A    | HSPC159 | RNF144A  |
| BCL2L1    | HSPH1   | RNF168   |
| BCL6      | HTR3C   | RNF19A   |
| BDH1      | HTR3D   | RNF216   |
| BFSP1     | HTR3E   | RNF24    |
| BGLAP     | HTRA2   | ROBLD3   |
| BHLHE40   | IAH1    | ROCK2    |
| BIRC5     | ICA1    | ROMO1    |
| BIRC6     | ID1     | RORC     |
| BLCAP     | ID2     | RPA3     |
| BMP10     | IDH3B   | RPL22L1  |
| BMP2      | IFI16   | RPL24    |
| BMP7      | IFT172  | RPL35A   |
| BMPER     | IFT52   | RPL39L   |
| BNIPL     | IFT57   | RPN2     |
| BOLA1     | IGF2BP2 | RPRD1B   |
| BOLA3     | IGF2BP3 | RPRD2    |
| BPI       | IGSF11  | RPS27    |
| BPIL1     | IGSF8   | RPS27A   |
| BPIL3     | IGSF9   | RPS7     |
| BRE       | IKZF3   | RPTN     |
| BRP44     | IL1RAP  | RRBP1    |
| BTBD3     | IL6     | RRM2     |
| BZW2      | IL6R    | RRM2B    |
| C10orf113 | ILDR2   | RSAD2    |
| C10orf114 | ILF2    | RSPH10B  |
| C10orf140 | IMPG2   | RSPH10B2 |

|           |          |          |
|-----------|----------|----------|
| C10orf47  | INHBA    | RSPO2    |
| C10orf67  | INO80B   | RSPO4    |
| C10orf68  | INSM1    | RTKN     |
| C13orf26  | INSRR    | RTN4     |
| C13orf33  | INTS1    | RTP1     |
| C17orf101 | INTS3    | RTP2     |
| C17orf55  | INTS8    | RTP4     |
| C17orf56  | IQCE     | RUNX1T1  |
| C17orf62  | IQCG     | RUSC1    |
| C17orf70  | IQGAP3   | RXFP4    |
| C17orf89  | ISG20L2  | RXRG     |
| C17orf90  | ISM1     | S100A1   |
| C1D       | ISPD     | S100A10  |
| C1orf104  | ITCH     | S100A11  |
| C1orf110  | ITGA10   | S100A12  |
| C1orf111  | ITGB1    | S100A13  |
| C1orf112  | ITGB1BP1 | S100A14  |
| C1orf115  | ITGB8    | S100A16  |
| C1orf156  | ITLN1    | S100A2   |
| C1orf182  | ITLN2    | S100A3   |
| C1orf189  | ITPA     | S100A4   |
| C1orf192  | ITPR1    | S100A5   |
| C1orf204  | ITSN2    | S100A6   |
| C1orf226  | IVL      | S100A7   |
| C1orf230  | JAG1     | S100A7A  |
| C1orf43   | JAZF1    | S100A7L2 |
| C1orf51   | JPH2     | S100A8   |
| C1orf54   | JTB      | S100A9   |
| C1orf56   | KATNAL1  | SALL4    |
| C1orf61   | KBTBD12  | SAMD12   |
| C1orf66   | KCNB1    | SAMD7    |
| C1orf68   | KCNF1    | SAMHD1   |
| C1orf77   | KCNG1    | SCAMP3   |
| C1orf85   | KCNG3    | SCAND1   |
| C1orf92   | KCNJ10   | SCIN     |
| C1QTNF1   | KCNJ9    | SCNM1    |
| C20orf103 | KCNK12   | SCRT2    |
| C20orf106 | KCNK15   | SDC1     |
| C20orf107 | KCNK3    | SDC2     |
| C20orf108 | KCNMB2   | SDC4     |
| C20orf111 | KCNMB3   | SDCBP2   |
| C20orf112 | KCNN3    | SDHC     |
| C20orf114 | KCNS1    | SEC14L1  |
| C20orf117 | KCNS2    | SEC22B   |

|           |           |          |
|-----------|-----------|----------|
| C20orf118 | KCNV1     | SEC23B   |
| C20orf12  | KDEL2     | SEC61A2  |
| C20orf123 | KHK       | SEC62    |
| C20orf132 | KIAA0226  | SECTM1   |
| C20orf134 | KIAA0406  | SEL1L2   |
| C20orf141 | KIAA0907  | SELE     |
| C20orf144 | KIAA1217  | SELENBP1 |
| C20orf152 | KIAA1429  | SELL     |
| C20orf160 | KIAA1462  | SELP     |
| C20orf165 | KIAA1524  | SEMA4A   |
| C20orf173 | KIAA1755  | SEMA4F   |
| C20orf177 | KIAA1841  | SEMA6C   |
| C20orf185 | KIDINS220 | SEMG1    |
| C20orf186 | KIF16B    | SEMG2    |
| C20orf194 | KIF3B     | SENP2    |
| C20orf196 | KIF3C     | SENP5    |
| C20orf197 | KIF5B     | SENP7    |
| C20orf202 | KIFAP3    | SERINC3  |
| C20orf24  | KIR2DL4   | SERTAD2  |
| C20orf26  | KIRREL    | SETDB1   |
| C20orf27  | KLF10     | SF3B14   |
| C20orf29  | KLF11     | SF3B4    |
| C20orf3   | KLHDC9    | SFRS6    |
| C20orf30  | KLHL24    | SFRS7    |
| C20orf4   | KLHL6     | SFT2D2   |
| C20orf43  | KLHL7     | SFXN5    |
| C20orf46  | KLRAQ1    | SGK2     |
| C20orf54  | KLRC2     | SH2D1B   |
| C20orf7   | KNG1      | SH2D2A   |
| C20orf70  | KPRP      | SH3YL1   |
| C20orf71  | KRTCAP2   | SHC1     |
| C20orf72  | KRTCAP3   | SHE      |
| C20orf79  | L3MBTL    | SI       |
| C20orf85  | LAMP3     | SIGLEC1  |
| C20orf94  | LAPTM4A   | SIRPA    |
| C20orf96  | LAPTM4B   | SIRPB2   |
| C2CD4D    | LASS2     | SIRPD    |
| C2orf16   | LBH       | SIRPG    |
| C2orf18   | LBP       | SIRT7    |
| C2orf3    | LBX2      | SIX2     |
| C2orf34   | LCE1A     | SIX3     |
| C2orf39   | LCE1B     | SKAP2    |
| C2orf42   | LCE1C     | SKIL     |
| C2orf43   | LCE1E     | SLA2     |

|          |           |          |
|----------|-----------|----------|
| C2orf44  | LCE1F     | SLAMF1   |
| C2orf48  | LCE2A     | SLAMF6   |
| C2orf50  | LCE2B     | SLAMF7   |
| C2orf53  | LCE2C     | SLAMF8   |
| C2orf61  | LCE2D     | SLAMF9   |
| C2orf63  | LCE3A     | SLC12A5  |
| C2orf65  | LCE3D     | SLC13A3  |
| C2orf7   | LCE3E     | SLC1A4   |
| C2orf70  | LCE4A     | SLC23A2  |
| C2orf71  | LCE5A     | SLC24A3  |
| C2orf73  | LCE6A     | SLC25A10 |
| C2orf74  | LCLAT1    | SLC25A32 |
| C2orf78  | LELP1     | SLC25A44 |
| C2orf79  | LENEP     | SLC26A7  |
| C2orf81  | LEPREL1   | SLC27A3  |
| C2orf84  | LFNG      | SLC29A4  |
| C2orf86  | LGALS3BP  | SLC2A10  |
| C2orf90  | LHCGR     | SLC2A2   |
| C3orf21  | LINGO4    | SLC30A6  |
| C3orf26  | LIPH      | SLC30A8  |
| C3orf34  | LMLN      | SLC32A1  |
| C3orf43  | LMNA      | SLC35C2  |
| C3orf59  | LMX1A     | SLC39A1  |
| C3orf70  | LNP1      | SLC39A12 |
| C7orf10  | LOC283999 | SLC3A1   |
| C7orf11  | LOC375190 | SLC4A11  |
| C7orf16  | LOC388946 | SLC4A1AP |
| C7orf26  | LOC402644 | SLC4A5   |
| C7orf27  | LOC642502 | SLC5A6   |
| C7orf28A | LOC647309 | SLC7A1   |
| C7orf30  | LOC728819 | SLC7A14  |
| C7orf31  | LOR       | SLC8A1   |
| C7orf46  | LOXL3     | SLC9A8   |
| C7orf70  | LPIN1     | SLMO2    |
| C8orf37  | LPIN3     | SLPI     |
| C8orf38  | LPP       | SMC6     |
| C8orf47  | LRCH3     | SMCP     |
| CA14     | LRP12     | SMEK2    |
| CACNB2   | LRPPRC    | SMG5     |
| CADM3    | LRRC31    | SMOX     |
| CALB1    | LRRC33    | SMYD5    |
| CALM2    | LRRC34    | SNAI1    |
| CAMK1D   | LRRC45    | SNAP25   |
| CAMK2N2  | LRRC52    | SNAPIN   |

|         |          |         |
|---------|----------|---------|
| CANT1   | LRRC69   | SNPH    |
| CAPN13  | LRRIQ4   | SNRNP27 |
| CAPN14  | LRRN4    | SNRPB   |
| CARD11  | LRRTM1   | SNRPB2  |
| CASQ1   | LRRTM4   | SNRPG   |
| CASS4   | LTBP1    | SNTA1   |
| CBFA2T2 | LY9      | SNTG2   |
| CBLB    | LYSMD1   | SNX13   |
| CBLN4   | LYZL1    | SNX17   |
| CBX2    | LYZL2    | SNX21   |
| CBX3    | MACC1    | SNX27   |
| CBX4    | MACROD2  | SNX31   |
| CBX8    | MAD1L1   | SNX5    |
| CCDC104 | MAEL     | SOCS3   |
| CCDC121 | MAFB     | SOCS5   |
| CCDC126 | MAFG     | SOS1    |
| CCDC129 | MAFK     | SOSTDC1 |
| CCDC137 | MAGEF1   | SOX11   |
| CCDC142 | MANBAL   | SOX12   |
| CCDC19  | MAP1LC3A | SP4     |
| CCDC39  | MAP3K13  | SPAG1   |
| CCDC50  | MAP3K8   | SPAG4   |
| CCDC54  | MAP4K3   | SPAG6   |
| CCDC7   | MAP6D1   | SPAST   |
| CCDC75  | MAPRE1   | SPATA16 |
| CCDC85A | MAPRE3   | SPATA2  |
| CCDC88A | MASP1    | SPDYA   |
| CCNE2   | MASTL    | SPEF1   |
| CCT3    | MATN2    | SPINLW1 |
| CCT4    | MATN3    | SPINT3  |
| CCT7    | MATN4    | SPINT4  |
| CD1A    | MAVS     | SPO11   |
| CD1B    | MBOAT2   | SPR     |
| CD1C    | MC3R     | SPRED2  |
| CD1D    | MCCC1    | SPRR1A  |
| CD1E    | MCEE     | SPRR1B  |
| CD207   | MCF2L2   | SPRR2A  |
| CD244   | MCFD2    | SPRR2B  |
| CD247   | MCL1     | SPRR2D  |
| CD40    | MCM8     | SPRR2E  |
| CD47    | MDH1     | SPRR2F  |
| CD48    | MECOM    | SPRR2G  |
| CD5L    | MEF2D    | SPRR3   |
| CD7     | MEIS1    | SPRR4   |



|          |           |               |
|----------|-----------|---------------|
| CD84     | MEMO1     | SPTA1         |
| CD93     | MEX3A     | SPTBN1        |
| CD96     | MFI2      | SPTLC3        |
| CDC123   | MFN1      | SRBD1         |
| CDC25B   | MFSD2B    | SRC           |
| CDC42SE1 | MGLL      | SRD5A2        |
| CDCA7L   | MGST3     | SRXN1         |
| CDH17    | MICALL2   | SSR2          |
| CDH22    | MINA      | SST           |
| CDH26    | MIOS      | SSTR4         |
| CDK13    | MKKS      | ST3GAL6       |
| CDK5RAP1 | MKX       | ST6GAL1       |
| CDKL4    | MLLT10    | STAMBP        |
| CDS2     | MLLT11    | STAU1         |
| CEBPB    | MMD2      | STK3          |
| CELF3    | MMP24     | STK31         |
| CENPA    | MMP9      | STK35         |
| CENPB    | MNDA      | STK4          |
| CENPO    | MOBKL1B   | STON1         |
| CEP170   | MOCS3     | STON1-GTF2A1L |
| CEP250   | MOGS      | STRA13        |
| CEP68    | MORC1     | STRN          |
| CEP97    | MORN2     | STS           |
| CFHR3    | MPHOSPH10 | STX16         |
| CGN      | MPP6      | STX19         |
| CGREF1   | MPP7      | SULF2         |
| CHAC2    | MPZ       | SUMF1         |
| CHD6     | MPZL1     | SUN1          |
| CHGB     | MRPL12    | SUN5          |
| CHMP4B   | MRPL19    | SUPT7L        |
| CHRD     | MRPL24    | SV2A          |
| CHRNA2   | MRPL33    | SVIL          |
| CIB4     | MRPL47    | SYBU          |
| CKS1B    | MRPL53    | SYCP2         |
| CLCN2    | MRPL9     | SYNGR2        |
| CLDN1    | MRPS21    | SYS1          |
| CLDN11   | MRPS26    | SYT11         |
| CLDN16   | MSH2      | TACR1         |
| CLDND1   | MSH6      | TADA1         |
| CLEC4F   | MSRB2     | TAF1B         |
| CLIP4    | MSTO1     | TAGLN2        |
| CLK2     | MTA3      | TARS2         |
| CMPK2    | MTDH      | TASP1         |
| CNRIP1   | MTHFD2    | TBC1D20       |

|         |          |          |
|---------|----------|----------|
| COL28A1 | MTIF2    | TBC1D23  |
| COL8A1  | MTMR11   | TBCCD1   |
| COLEC10 | MTPAP    | TBCD     |
| COLEC11 | MTUS2    | TBL1XR1  |
| COMMD1  | MTX1     | TBX19    |
| COMMD7  | MUC1     | TCF15    |
| COPA    | MUC4     | TCF23    |
| COX4I2  | MXD1     | TCHH     |
| COX6C   | MYADML2  | TCHHL1   |
| COX7A2L | MYBL2    | TCTEX1D2 |
| CPNE1   | MYCN     | TDRD10   |
| CPOX    | MYH15    | TDRKH    |
| CPSF3   | MYH7B    | TET3     |
| CPXM1   | MYL9     | TEX19    |
| CRABP2  | MYLK2    | TEX261   |
| CRCT1   | MYNN     | TFAP2C   |
| CREB3L4 | MYO3A    | TFG      |
| CREB5   | MYT1L    | TFRC     |
| CREG1   | NAA20    | TGFA     |
| CREM    | NAALADL2 | TGIF2    |
| CRIM1   | NAGK     | TGM2     |
| CRIPT   | NANP     | TGM3     |
| CRLS1   | NAPB     | TGM6     |
| CRNKL1  | NARF     | TH1L     |
| CRNN    | NAT8     | THADA    |
| CRP     | NAT8B    | THBD     |
| CRTC2   | NBAS     | THBS3    |
| CRYBG3  | NBN      | THEM4    |
| CRYGS   | NBPF10   | THEM5    |
| CSE1L   | NBPF14   | THNSL1   |
| CSNK2A1 | NBPF16   | THOC4    |
| CSRP2BP | NCALD    | THPO     |
| CST1    | NCBP2    | THSD7A   |
| CST11   | NCEH1    | THUMPD2  |
| CST2    | NCOA1    | TIA1     |
| CST3    | NCOA3    | TIMP2    |
| CST4    | NCOA5    | TIPRL    |
| CST5    | NCOA6    | TK1      |
| CST7    | NCSTN    | TLX2     |
| CST8    | NDRG3    | TM4SF19  |
| CST9    | NDUFB5   | TM7SF4   |
| CST9L   | NDUFS2   | TM9SF4   |
| CSTF1   | NEBL     | TMC2     |
| CSTL1   | NECAB1   | TMC6     |

|         |          |                |
|---------|----------|----------------|
| CTCFL   | NECAB3   | TMC8           |
| CTHRC1  | NES      | TMCO1          |
| CTNNA2  | NEURL2   | TMEM105        |
| CTNNBL1 | NFATC2   | TMEM17         |
| CTSA    | NFE2L3   | TMEM178        |
| CTSK    | NFKBIZ   | TMEM18         |
| CTSS    | NFS1     | TMEM184A       |
| CTSZ    | NHLH1    | TMEM189        |
| CYCS    | NINL     | TMEM189-UBE2V1 |
| CYP1B1  | NIPAL2   | TMEM196        |
| CYP24A1 | NIT1     | TMEM207        |
| CYP26B1 | NIT2     | TMEM214        |
| CYS1    | NKX2-2   | TMEM41A        |
| CYTH1   | NKX2-4   | TMEM45A        |
| CYTH3   | NLGN1    | TMEM55A        |
| DAGLB   | NLRC4    | TMEM64         |
| DAP3    | NME7     | TMEM67         |
| DARC    | NNAT     | TMEM74         |
| DBNDD2  | NOL10    | TMEM79         |
| DCAF13  | NOP56    | TMEM90B        |
| DCAF6   | NOS1AP   | TMOD4          |
| DCAF8   | NOTCH2NL | TMX4           |
| DCBLD2  | NOTO     | TNFAIP8L2      |
| DCST1   | NOTUM    | TNFSF10        |
| DCST2   | NPB      | TNIK           |
| DCTN1   | NPEPL1   | TNK2           |
| DCUN1D1 | NPLOC4   | TNNC2          |
| DCXR    | NPR1     | TNRC18         |
| DDR2    | NPSR1    | TNRC6C         |
| DDRGK1  | NPVF     | TOMM20         |
| DDX1    | NPY      | TOMM34         |
| DDX27   | NR1I3    | TOMM40L        |
| DECR1   | NRBP1    | TOMM7          |
| DEDD    | NRP1     | TOMM70A        |
| DEFB115 | NRSN2    | TOP1           |
| DEFB116 | NRXN1    | TOX2           |
| DEFB118 | NSFL1C   | TP53I3         |
| DEFB119 | NSUN3    | TP53INP1       |
| DEFB121 | NSUN6    | TP53INP2       |
| DEFB123 | NT5C1B   | TP53RK         |
| DEFB124 | NTRK1    | TP53TG5        |
| DEFB125 | NTSR2    | TP63           |
| DEFB126 | NUDCD1   | TPM3           |
| DEFB127 | NUDT5    | TPRG1          |

|         |         |         |
|---------|---------|---------|
| DEFB128 | NUF2    | TPRKB   |
| DEFB129 | NUP210L | TPTE    |
| DEFB132 | NUPL2   | TPX2    |
| DENND4B | NXPH1   | TRA2A   |
| DFNA5   | NXT1    | TRA2B   |
| DGKB    | OAZ3    | TRAT1   |
| DGKG    | ODC1    | TRHR    |
| DGUOK   | ODF1    | TRIB2   |
| DHFRL1  | OLFML2B | TRIB3   |
| DHX35   | OR10J1  | TRIM46  |
| DHX57   | OR10J3  | TRMT6   |
| DLG1    | OR10J5  | TRMT61B |
| DLGAP4  | OR10K1  | TRPC4AP |
| DNAH11  | OR10K2  | TSHZ2   |
| DNAJB11 | OR10R2  | TSPAN10 |
| DNAJC1  | OR10T2  | TSPYL5  |
| DNAJC19 | OR10X1  | TSPYL6  |
| DNAJC27 | OR10Z1  | TSSC1   |
| DNMT3A  | OR13G1  | TSTD1   |
| DNMT3B  | OR14C36 | TTC14   |
| DNTTIP1 | OR2AK2  | TTC15   |
| DOK1    | OR2G2   | TTC24   |
| DOK5    | OR2G3   | TTC27   |
| DPM1    | OR2G6   | TTC31   |
| DPM3    | OR2L8   | TTC32   |
| DPPA2   | OR2M3   | TTC35   |
| DPPA4   | OR2M7   | TTC7A   |
| DPT     | OR2T29  | TTLL9   |
| DPY19L1 | OR2T33  | TTPAL   |
| DPY19L4 | OR2T34  | TUBB1   |
| DPY30   | OR2T35  | TUFT1   |
| DPYS    | OR2T4   | TXNDC3  |
| DPYSL5  | OR2T5   | UAP1    |
| DQX1    | OR2T6   | UBAP2L  |
| DSN1    | OR4K1   | UBE2C   |
| DSTN    | OR4K2   | UBE2Q1  |
| DTD1    | OR4K5   | UBE2V1  |
| DTNB    | OR4M1   | UBL3    |
| DUS1L   | OR4N2   | UBOX5   |
| DUSP11  | OR4Q3   | UBQLN4  |
| DUSP12  | OR5AC2  | UBR5    |
| DUSP15  | OR5H1   | UBXN2A  |
| DUSP23  | OR5H14  | UBXN7   |
| DUSP27  | OR5H15  | UCK2    |

|          |          |         |
|----------|----------|---------|
| DVL3     | OR5H2    | UFC1    |
| DYNC2LI1 | OR5H6    | UGP2    |
| DYNLRB1  | OR5K1    | UHMK1   |
| DYSF     | OR5K2    | UNCX    |
| DYSFIP1  | OR5K3    | UPF2    |
| DZIP3    | OR5K4    | UQCC    |
| E2F1     | OR6F1    | USF1    |
| E2F6     | OR6K2    | USP13   |
| EBAG9    | OR6K3    | USP21   |
| EBF4     | OR6K6    | USP34   |
| ECE2     | OR6N1    | USP36   |
| ECHDC3   | OR6N2    | USP42   |
| ECM1     | OR6P1    | USP6NL  |
| ECT2     | OR6Y1    | USPL1   |
| EDEM2    | OSBPL3   | UTS2D   |
| EDN3     | OSGIN2   | UTS2R   |
| EFCAB8   | OSR1     | VANGL2  |
| EFEMP1   | OSR2     | VAPB    |
| EFNA1    | OST4     | VAX2    |
| EFNA3    | OSTalpha | VHLL    |
| EFNA4    | OSTN     | VIT     |
| EFR3B    | OTOF     | VPS13B  |
| EGR4     | OTOR     | VPS16   |
| EHBP1    | OTUD1    | VPS45   |
| EHD3     | OTUD6B   | VPS54   |
| EHHADH   | OTUD7B   | VPS72   |
| EIF2AK1  | OTX1     | VPS8    |
| EIF2B4   | OVOL2    | VRK2    |
| EIF2B5   | OXER1    | VSIG8   |
| EIF2S2   | OXR1     | VSNL1   |
| EIF3E    | OXT      | VSTM2L  |
| EIF4A2   | P4HB     | VSX1    |
| EIF4G1   | PABPC1   | VWA5B2  |
| EIF5A2   | PABPC1L  | VWDE    |
| EIF6     | PAIP2B   | WAC     |
| ELFN1    | PAK2     | WBP1    |
| ELMO1    | PAK7     | WDR35   |
| ELMO2    | PANK2    | WDR43   |
| EMILIN1  | PAPOLB   | WDR45L  |
| EMILIN3  | PAPOLG   | WDR53   |
| EML4     | PAQR6    | WDR54   |
| EML6     | PARD3    | WDR92   |
| EMX1     | PARD6B   | WFDC10A |
| ENGASE   | PARL     | WFDC10B |

|         |         |         |
|---------|---------|---------|
| ENKUR   | PAX1    | WFDC11  |
| ENPP7   | PBX1    | WFDC12  |
| ENSA    | PBXIP1  | WFDC13  |
| ENTPD6  | PCBP1   | WFDC2   |
| ENY2    | PCGF1   | WFDC3   |
| EPAS1   | PCIF1   | WFDC5   |
| EPB41L1 | PCK1    | WFDC6   |
| EPC1    | PCNA    | WFDC8   |
| EPCAM   | PCNP    | WFDC9   |
| EPHA6   | PCP4L1  | WIP12   |
| EPHB3   | PCSK2   | WISP2   |
| EPT1    | PCYOX1  | XCL1    |
| ERGIC3  | PCYT1A  | XCL2    |
| ERLEC1  | PCYT2   | XDH     |
| ESF1    | PDE1C   | XKR7    |
| ESRP1   | PDE4DIP | XPO1    |
| ETAA1   | PDE6G   | XRN2    |
| ETV1    | PDIA6   | YEATS2  |
| ETV3    | PDP1    | YIPF4   |
| ETV3L   | PDRG1   | YME1L1  |
| ETV5    | PDSS1   | YPEL5   |
| EVX1    | PDYN    | YWHAB   |
| EXOC3L2 | PEA15   | YWHAQ   |
| EXOC6B  | PEAR1   | YWHAZ   |
| EYA2    | PELI1   | YY1AP1  |
| F11R    | PEX13   | ZBED2   |
| F5      | PEX19   | ZBP1    |
| FAM110A | PEX5L   | ZBTB11  |
| FAM110C | PFDN2   | ZBTB7B  |
| FAM113A | PFDN4   | ZCCHC3  |
| FAM126A | PFN4    | ZDHHC19 |
| FAM131A | PGCP    | ZDHHC4  |
| FAM136A | PGLYRP3 | ZFP36L2 |
| FAM150B | PGLYRP4 | ZFP64   |
| FAM161A | PGS1    | ZFPM2   |
| FAM176A | PHACTR3 | ZHX3    |
| FAM179A | PHC3    | ZMAT3   |
| FAM189B | PHF14   | ZMYND8  |
| FAM49A  | PHF20   | ZNF12   |
| FAM55C  | PHLDB2  | ZNF133  |
| FAM63A  | PI3     | ZNF217  |
| FAM65C  | PI4KB   | ZNF334  |
| FAM83C  | PIGF    | ZNF335  |
| FAM83D  | PIGM    | ZNF337  |

|         |         |        |
|---------|---------|--------|
| FAM84A  | PIGT    | ZNF341 |
| FAM92A1 | PIGU    | ZNF343 |
| FAM98A  | PIGX    | ZNF438 |
| FANCL   | PIGZ    | ZNF512 |
| FASN    | PIK3CA  | ZNF513 |
| FASTKD5 | PIP4K2A | ZNF638 |
| FBXL18  | PIP5K1A | ZNF639 |
| FBXO11  | PKDCC   | ZNF687 |
| FBXO41  | PKHD1L1 | ZNF706 |
| FBXO43  | PKIG    | ZNF750 |
| FBXO45  | PKLR    | ZNF831 |
| FBXO48  | PLAGL2  | ZNF853 |
| FCER1A  | PLB1    | ZNFX1  |
| ZSWIM1  | ZSWIM3  | ZPLD1  |

---
