# Supplementary material for: Three Prognostic Biomarkers Correlate with Immune Checkpoint Blockade Response in Bladder Urothelial Carcinoma
Source: Hindawi journal article supplement (doi:10.1155/2022/3342666), 2022-05-26
Supplement: f1 [file 3342666.f1.zip]

# Supplementary 1 Different expression genes from GEPIA database

| Gene Symbol   | Gene ID            | Median<br>(Tumor) | Median<br>(Normal) | Log2(Fold<br>Change) | adjp     |
|---------------|--------------------|-------------------|--------------------|----------------------|----------|
| AC239868.2    | ENSG00000280874.1  | 35.69             | 0                  | 5.197                | 9.74E-13 |
| AC239868.3    | ENSG00000281134.1  | 35.626            | 0                  | 5.195                | 2.76E-12 |
| UBE2C         | ENSG00000175063.16 | 130.734           | 3.811              | 4.775                | 1.40E-39 |
| RP5-940J5.9   | ENSG00000269968.1  | 82.733            | 2.166              | 4.725                | 3.95E-03 |
| CDC20         | ENSG00000117399.13 | 68.554            | 2.854              | 4.174                | 6.93E-33 |
| MYBL2         | ENSG00000101057.15 | 36.015            | 1.179              | 4.086                | 1.52E-23 |
| TOP2A         | ENSG00000131747.14 | 52.916            | 2.752              | 3.845                | 7.01E-32 |
| FAM83A        | ENSG00000147689.16 | 21.87             | 0.64               | 3.802                | 8.03E-03 |
| TROAP         | ENSG00000135451.12 | 28.819            | 1.18               | 3.774                | 5.34E-30 |
| KRT7          | ENSG00000135480.14 | 1655.555          | 121.718            | 3.755                | 1.79E-07 |
| CTB-191K22.5  | ENSG00000267815.1  | 53.79             | 3.119              | 3.734                | 2.88E-07 |
| TK1           | ENSG00000167900.11 | 69.738            | 4.572              | 3.666                | 7.46E-31 |
| BIRC5         | ENSG00000089685.14 | 29.485            | 1.424              | 3.653                | 1.19E-26 |
| AURKB         | ENSG00000178999.12 | 34.675            | 1.95               | 3.596                | 2.06E-27 |
| CENPF         | ENSG00000117724.12 | 32.095            | 1.748              | 3.59                 | 7.40E-21 |
| ARAP1-AS1     | ENSG00000256007.1  | 18.904            | 0.687              | 3.561                | 1.98E-09 |
| TPX2          | ENSG00000088325.15 | 33.049            | 1.885              | 3.561                | 5.35E-24 |
| FOXM1         | ENSG00000111206.12 | 29.565            | 1.6                | 3.555                | 2.38E-20 |
| RRM2          | ENSG00000171848.13 | 37.425            | 2.306              | 3.539                | 4.46E-17 |
| PKMYT1        | ENSG00000127564.16 | 27.84             | 1.58               | 3.483                | 5.31E-31 |
| CCNB2         | ENSG00000157456.7  | 30.939            | 1.907              | 3.458                | 2.12E-25 |
| KRT16         | ENSG00000186832.8  | 32.895            | 2.235              | 3.389                | 9.21E-03 |
| RP11-316M1.12 | ENSG00000259357.2  | 23.095            | 1.397              | 3.329                | 3.68E-10 |
| CA9           | ENSG00000107159.12 | 10.455            | 0.235              | 3.213                | 1.93E-06 |
| CDK1          | ENSG00000170312.15 | 35.559            | 2.985              | 3.198                | 2.31E-31 |
| CCNB1         | ENSG00000134057.14 | 59.941            | 5.693              | 3.187                | 1.05E-22 |
| KIF20A        | ENSG00000112984.11 | 14.325            | 0.685              | 3.185                | 1.79E-21 |
| RP11-498C9.3  | ENSG00000262413.1  | 8.795             | 0.08               | 3.182                | 4.97E-04 |
| NCAPH         | ENSG00000121152.9  | 14.775            | 0.757              | 3.166                | 3.14E-22 |
| MELK          | ENSG00000165304.7  | 13.23             | 0.612              | 3.142                | 1.24E-17 |
| ZWINT         | ENSG00000122952.16 | 36.459            | 3.293              | 3.125                | 1.20E-22 |
| KIF2C         | ENSG00000142945.12 | 18.385            | 1.242              | 3.112                | 3.76E-24 |
| NUSAP1        | ENSG00000137804.12 | 26.905            | 2.255              | 3.1                  | 3.17E-19 |
| GJB2          | ENSG00000165474.5  | 37.829            | 3.556              | 3.091                | 8.20E-05 |
| NUF2          | ENSG00000143228.12 | 12.595            | 0.61               | 3.078                | 4.47E-19 |
| TUBB3         | ENSG00000258947.6  | 35.407            | 3.314              | 3.077                | 1.21E-08 |
| AC098973.2    | ENSG00000225548.5  | 7.429             | 0                  | 3.075                | 8.14E-04 |
| NEK2          | ENSG00000117650.12 | 12.115            | 0.573              | 3.06                 | 4.24E-20 |
| AC021066.1    | ENSG00000281415.1  | 294.709           | 34.486             | 3.059                | 3.29E-03 |
| RP4-738P15.6  | ENSG00000279322.1  | 20.559            | 1.627              | 3.037                | 2.08E-09 |

|               |                    |         |        |       |          |
|---------------|--------------------|---------|--------|-------|----------|
| AC104534.3    | ENSG00000268083.5  | 8.89    | 0.221  | 3.018 | 2.41E-04 |
| CENPA         | ENSG00000115163.14 | 11.4    | 0.54   | 3.009 | 8.13E-20 |
| CDCA3         | ENSG00000111665.11 | 28.406  | 2.658  | 3.007 | 3.43E-24 |
| CDCA5         | ENSG00000146670.9  | 17.71   | 1.345  | 2.996 | 2.09E-19 |
| CST1          | ENSG00000170373.8  | 8.2     | 0.154  | 2.995 | 2.84E-07 |
| CDCA8         | ENSG00000134690.10 | 14.965  | 1.023  | 2.98  | 9.83E-22 |
| PTTG1         | ENSG00000164611.12 | 69.915  | 8.129  | 2.958 | 2.01E-20 |
| KIAA0101      | ENSG00000166803.10 | 51.46   | 5.785  | 2.951 | 3.77E-26 |
| ASF1B         | ENSG00000105011.8  | 20.659  | 1.819  | 2.942 | 1.21E-25 |
| UHRF1         | ENSG00000276043.4  | 14.465  | 1.036  | 2.925 | 1.96E-24 |
| PLK1          | ENSG00000166851.14 | 26.015  | 2.586  | 2.913 | 5.66E-18 |
| MKI67         | ENSG00000148773.12 | 17      | 1.402  | 2.906 | 2.06E-20 |
| CEP55         | ENSG00000138180.15 | 13.125  | 0.923  | 2.877 | 7.46E-19 |
| CDC45         | ENSG00000093009.9  | 14.655  | 1.143  | 2.869 | 1.96E-26 |
| MMP1          | ENSG00000196611.4  | 11.055  | 0.662  | 2.858 | 3.43E-05 |
| TMEM132A      | ENSG00000006118.14 | 37.236  | 4.28   | 2.856 | 2.54E-23 |
| AURKA         | ENSG00000087586.17 | 18.775  | 1.755  | 2.844 | 1.03E-19 |
| GGH           | ENSG00000137563.11 | 40.975  | 5      | 2.807 | 5.02E-13 |
| ANLN          | ENSG00000011426.10 | 16.72   | 1.54   | 2.802 | 6.77E-13 |
| CDT1          | ENSG00000167513.8  | 13.995  | 1.17   | 2.789 | 1.33E-21 |
| RECQL4        | ENSG00000160957.12 | 27.77   | 3.165  | 2.788 | 3.70E-28 |
| CTC-425F1.4   | ENSG00000267458.1  | 34.5    | 4.149  | 2.785 | 4.73E-06 |
| DUXAP8        | ENSG00000206195.10 | 8.99    | 0.453  | 2.781 | 7.34E-10 |
| KIFC1         | ENSG00000237649.7  | 21.495  | 2.284  | 2.776 | 3.94E-21 |
| LINC01296     | ENSG00000244306.9  | 8.405   | 0.39   | 2.758 | 3.21E-09 |
| RP11-256P1.1  | ENSG00000249971.1  | 5.765   | 0      | 2.758 | 6.88E-05 |
| PRC1          | ENSG00000198901.13 | 44.835  | 5.835  | 2.746 | 4.89E-19 |
| DLGAP5        | ENSG00000126787.12 | 8.595   | 0.448  | 2.728 | 5.95E-16 |
| SPP1          | ENSG00000118785.13 | 50.83   | 6.861  | 2.721 | 2.08E-06 |
| KLHDC7B       | ENSG00000130487.5  | 7.505   | 0.29   | 2.721 | 1.03E-04 |
| KIF18B        | ENSG00000186185.13 | 7.205   | 0.26   | 2.703 | 3.50E-19 |
| SPAG5         | ENSG00000076382.16 | 31.465  | 3.988  | 2.702 | 1.67E-24 |
| FAM64A        | ENSG00000129195.15 | 8.615   | 0.487  | 2.693 | 3.69E-15 |
| RP11-667K14.4 | ENSG00000262533.1  | 8.45    | 0.465  | 2.69  | 3.33E-07 |
| PYCR1         | ENSG00000183010.16 | 36.63   | 4.854  | 2.685 | 1.40E-11 |
| ISG15         | ENSG00000187608.8  | 211.842 | 32.513 | 2.667 | 9.72E-11 |
| RP11-161H23.5 | ENSG00000258232.2  | 283.145 | 43.736 | 2.667 | 1.94E-27 |
| IQGAP3        | ENSG00000183856.10 | 7.475   | 0.335  | 2.666 | 8.99E-18 |
| APOC1         | ENSG00000130208.9  | 102.963 | 15.507 | 2.655 | 3.60E-12 |
| TRIP13        | ENSG00000071539.13 | 12.405  | 1.155  | 2.637 | 4.00E-14 |
| FUT3          | ENSG00000171124.12 | 13.855  | 1.391  | 2.635 | 3.58E-04 |
| CENPM         | ENSG00000100162.14 | 20.659  | 2.499  | 2.63  | 1.26E-25 |
| NDC80         | ENSG00000080986.12 | 12.19   | 1.153  | 2.615 | 6.04E-15 |

|                   |                    |          |         |       |          |
|-------------------|--------------------|----------|---------|-------|----------|
| KIF23             | ENSG00000137807.13 | 13.735   | 1.405   | 2.615 | 3.62E-16 |
| LY6K              | ENSG00000160886.13 | 21.069   | 2.604   | 2.614 | 9.44E-06 |
| UBE2T             | ENSG00000077152.9  | 31.659   | 4.342   | 2.612 | 1.16E-22 |
| HN1               | ENSG00000189159.15 | 418.112  | 67.817  | 2.607 | 2.23E-32 |
| RAD54L            | ENSG00000085999.11 | 9.61     | 0.75    | 2.6   | 1.55E-22 |
| NCAPG             | ENSG00000109805.9  | 8.7      | 0.6     | 2.6   | 8.02E-18 |
| CKS2              | ENSG00000123975.4  | 101.359  | 15.952  | 2.594 | 7.99E-23 |
| CST6              | ENSG00000175315.2  | 14.775   | 1.615   | 2.593 | 8.75E-08 |
| CCNA2             | ENSG00000145386.9  | 14.205   | 1.54    | 2.582 | 5.53E-15 |
| KRT14             | ENSG00000186847.5  | 12.009   | 1.177   | 2.579 | 3.37E-03 |
| KRT17             | ENSG00000128422.15 | 1036.137 | 173.087 | 2.575 | 7.41E-04 |
| AP000349.2        | ENSG00000280178.1  | 8.625    | 0.62    | 2.571 | 2.52E-08 |
| KIF4A             | ENSG00000090889.11 | 7.49     | 0.428   | 2.571 | 2.83E-17 |
| LL22NC03-N14H11.1 | ENSG00000272872.1  | 7.26     | 0.395   | 2.566 | 1.01E-09 |
| CDC6              | ENSG00000094804.9  | 10.72    | 1.004   | 2.548 | 2.16E-15 |
| SPC25             | ENSG00000152253.8  | 8.085    | 0.553   | 2.548 | 1.64E-15 |
| FABP6             | ENSG00000170231.15 | 12.435   | 1.34    | 2.522 | 4.87E-05 |
| TTK               | ENSG00000112742.9  | 7.18     | 0.43    | 2.516 | 2.40E-17 |
| CDKN3             | ENSG00000100526.19 | 21.296   | 2.999   | 2.479 | 1.88E-12 |
| TACC3             | ENSG00000013810.18 | 45.005   | 7.355   | 2.461 | 2.03E-22 |
| KPNA2             | ENSG00000182481.8  | 100.883  | 17.7    | 2.446 | 5.87E-16 |
| STMN1             | ENSG00000117632.20 | 274.83   | 49.834  | 2.44  | 7.07E-14 |
| WDR72             | ENSG00000166415.14 | 7.975    | 0.654   | 2.44  | 2.17E-05 |
| S100A14           | ENSG00000189334.8  | 183.583  | 33.412  | 2.423 | 8.97E-05 |
| SAPCD2            | ENSG00000186193.8  | 8.965    | 0.875   | 2.41  | 3.81E-16 |
| RP11-6N17.6       | ENSG00000264019.1  | 6.265    | 0.372   | 2.404 | 7.71E-09 |
| ETV4              | ENSG00000175832.12 | 16.26    | 2.265   | 2.402 | 1.73E-10 |
| EXO1              | ENSG00000174371.16 | 6.34     | 0.395   | 2.396 | 9.42E-18 |
| SLC39A4           | ENSG00000147804.9  | 86.509   | 15.663  | 2.393 | 9.52E-26 |
| PRSS8             | ENSG00000052344.15 | 45.215   | 7.804   | 2.392 | 3.76E-10 |
| GTSE1             | ENSG00000075218.18 | 7.705    | 0.66    | 2.391 | 4.51E-19 |
| RAD51             | ENSG00000051180.16 | 10.99    | 1.304   | 2.38  | 4.02E-21 |
| MAD2L1            | ENSG00000164109.13 | 20.619   | 3.194   | 2.366 | 1.68E-12 |
| SPC24             | ENSG00000161888.11 | 11.385   | 1.41    | 2.362 | 2.42E-18 |
| PBK               | ENSG00000168078.9  | 6.945    | 0.555   | 2.353 | 4.08E-13 |
| C4orf48           | ENSG00000243449.6  | 19.425   | 3.02    | 2.345 | 5.32E-16 |
| ORC6              | ENSG00000091651.8  | 10.885   | 1.345   | 2.341 | 1.72E-19 |
| ASPM              | ENSG00000066279.16 | 5.955    | 0.375   | 2.339 | 1.13E-14 |
| SKA3              | ENSG00000165480.15 | 5.88     | 0.364   | 2.335 | 5.94E-19 |
| PRR11             | ENSG00000068489.12 | 9.02     | 1       | 2.325 | 8.69E-13 |
| BUB1B             | ENSG00000156970.12 | 8.94     | 0.996   | 2.316 | 8.54E-18 |
| GIN51             | ENSG00000101003.9  | 8.39     | 0.908   | 2.299 | 3.47E-18 |
| C15orf48          | ENSG00000166920.10 | 27.505   | 4.82    | 2.292 | 1.72E-06 |
| HJURP             | ENSG00000123485.11 | 8.695    | 0.98    | 2.292 | 3.81E-21 |

|               |                    |         |        |       |          |
|---------------|--------------------|---------|--------|-------|----------|
| SYNE4         | ENSG00000181392.14 | 13.36   | 1.96   | 2.278 | 2.45E-06 |
| GIN52         | ENSG00000131153.8  | 9.79    | 1.24   | 2.268 | 4.20E-17 |
| ULBP2         | ENSG00000131015.4  | 5.204   | 0.289  | 2.267 | 4.15E-11 |
| KIF11         | ENSG00000138160.5  | 8.995   | 1.085  | 2.261 | 1.10E-14 |
| AC110615.1    | ENSG00000279909.1  | 4.475   | 0.145  | 2.258 | 5.40E-05 |
| BUB1          | ENSG00000169679.14 | 11.13   | 1.536  | 2.258 | 1.32E-16 |
| MDK           | ENSG00000110492.15 | 440.713 | 91.392 | 2.257 | 1.68E-07 |
| KLC3          | ENSG00000104892.16 | 5.85    | 0.434  | 2.256 | 6.38E-08 |
| CHI3L1        | ENSG00000133048.12 | 15.985  | 2.56   | 2.254 | 8.67E-03 |
| SFN           | ENSG00000175793.11 | 434.224 | 91.167 | 2.239 | 7.80E-09 |
| SNORD3A       | ENSG00000263934.4  | 233.745 | 48.881 | 2.235 | 3.95E-04 |
| CTSV          | ENSG00000136943.10 | 5.235   | 0.329  | 2.23  | 1.35E-05 |
| MMP9          | ENSG00000100985.7  | 9.08    | 1.15   | 2.229 | 2.50E-03 |
| SKA1          | ENSG00000154839.9  | 4.955   | 0.285  | 2.213 | 6.46E-16 |
| APOBEC3B      | ENSG00000179750.15 | 14.385  | 2.325  | 2.21  | 1.06E-06 |
| IFI6          | ENSG00000126709.14 | 222.543 | 47.505 | 2.204 | 3.08E-04 |
| OIP5          | ENSG00000104147.8  | 5.74    | 0.465  | 2.202 | 1.17E-15 |
| UBE2SP2       | ENSG00000224126.2  | 15.525  | 2.599  | 2.199 | 6.72E-19 |
| HMMR          | ENSG00000072571.19 | 7.46    | 0.845  | 2.197 | 2.35E-13 |
| MCM2          | ENSG00000073111.13 | 26.325  | 4.972  | 2.194 | 1.76E-12 |
| MEX3A         | ENSG00000254726.2  | 5.535   | 0.435  | 2.187 | 4.16E-10 |
| CLIC3         | ENSG00000169583.12 | 20.25   | 3.685  | 2.181 | 1.30E-03 |
| E2F1          | ENSG00000101412.12 | 12.22   | 1.925  | 2.176 | 1.90E-10 |
| LMNB1         | ENSG00000113368.11 | 28.169  | 5.458  | 2.175 | 2.21E-13 |
| SQLE          | ENSG00000104549.11 | 36.255  | 7.325  | 2.162 | 8.89E-13 |
| ECT2          | ENSG00000114346.13 | 16.6    | 2.958  | 2.153 | 1.84E-11 |
| C16orf59      | ENSG00000162062.14 | 6.95    | 0.79   | 2.151 | 2.72E-25 |
| DUXAP9        | ENSG00000225210.9  | 4.945   | 0.34   | 2.15  | 1.92E-08 |
| TYMS          | ENSG00000176890.15 | 50.801  | 10.669 | 2.15  | 6.11E-11 |
| ESM1          | ENSG00000164283.12 | 4.075   | 0.145  | 2.148 | 5.87E-14 |
| CENPU         | ENSG00000151725.11 | 16.374  | 2.935  | 2.143 | 1.47E-15 |
| SHCBP1        | ENSG00000171241.8  | 6.175   | 0.625  | 2.143 | 5.99E-13 |
| CKS1B         | ENSG00000173207.12 | 140.784 | 31.177 | 2.14  | 8.40E-13 |
| DEPDC1B       | ENSG00000035499.12 | 5.145   | 0.395  | 2.139 | 9.20E-15 |
| LIPG          | ENSG00000101670.11 | 5.56    | 0.499  | 2.13  | 5.39E-05 |
| PAFAH1B3      | ENSG00000079462.7  | 94.375  | 20.837 | 2.127 | 4.33E-27 |
| KCNMB2-AS1    | ENSG00000237978.5  | 5.32    | 0.468  | 2.106 | 1.21E-07 |
| CKAP2L        | ENSG00000169607.12 | 4.44    | 0.265  | 2.105 | 1.50E-11 |
| ALDH3B2       | ENSG00000132746.14 | 19.983  | 3.895  | 2.1   | 1.58E-03 |
| SNORA76C      | ENSG00000277887.1  | 3.285   | 0      | 2.099 | 1.14E-03 |
| AC006262.5    | ENSG00000268621.5  | 3.425   | 0.039  | 2.09  | 2.89E-04 |
| CENPK         | ENSG00000123219.12 | 7.3     | 0.95   | 2.09  | 8.61E-13 |
| RP11-498C9.13 | ENSG00000263585.1  | 3.47    | 0.05   | 2.09  | 1.41E-04 |
| POC1A         | ENSG00000164087.7  | 11.19   | 1.865  | 2.089 | 1.46E-15 |

|                |                    |         |         |        |          |
|----------------|--------------------|---------|---------|--------|----------|
| RP11-386G11.10 | ENSG00000258017.1  | 241.67  | 56.645  | 2.074  | 8.91E-13 |
| HIST1H2BH      | ENSG00000275713.1  | 4.605   | 0.333   | 2.072  | 3.16E-08 |
| ESPL1          | ENSG00000135476.11 | 5.53    | 0.557   | 2.068  | 4.24E-10 |
| VGLL1          | ENSG00000102243.12 | 76.32   | 17.572  | 2.058  | 3.13E-04 |
| RAD51AP1       | ENSG00000111247.14 | 8.075   | 1.195   | 2.048  | 1.42E-09 |
| RP11-867G23.4  | ENSG00000254452.1  | 24.73   | 5.257   | 2.04   | 3.32E-08 |
| PAQR4          | ENSG00000162073.13 | 12.374  | 2.29    | 2.023  | 3.10E-14 |
| NME1           | ENSG00000239672.7  | 174.338 | 42.215  | 2.021  | 5.23E-32 |
| MYEOV          | ENSG00000172927.7  | 4.13    | 0.27    | 2.014  | 2.59E-03 |
| HES2           | ENSG00000069812.11 | 3.8     | 0.19    | 2.012  | 1.51E-03 |
| COL7A1         | ENSG00000114270.15 | 58.854  | 13.894  | 2.007  | 5.58E-07 |
| CYP27A1        | ENSG00000135929.8  | 4.755   | 22.023  | -2     | 3.49E-06 |
| SCN1B          | ENSG00000105711.10 | 1.97    | 10.884  | -2     | 2.04E-10 |
| C1R            | ENSG00000159403.15 | 91.979  | 371.058 | -2.001 | 2.52E-06 |
| NRP2           | ENSG00000118257.16 | 5.715   | 25.88   | -2.001 | 1.45E-07 |
| LRRK2          | ENSG00000188906.13 | 0.35    | 4.414   | -2.004 | 4.07E-31 |
| SLC9A9         | ENSG00000181804.14 | 2.065   | 11.319  | -2.007 | 6.75E-20 |
| LRIG1          | ENSG00000144749.13 | 3.14    | 15.679  | -2.01  | 2.39E-06 |
| PEG3           | ENSG00000198300.12 | 0.125   | 3.53    | -2.01  | 1.27E-20 |
| NGFR           | ENSG00000064300.8  | 0.8     | 6.264   | -2.013 | 6.61E-07 |
| BVES           | ENSG00000112276.13 | 0.445   | 4.855   | -2.019 | 1.01E-18 |
| AXIN2          | ENSG00000168646.12 | 1.375   | 8.631   | -2.02  | 3.53E-06 |
| OLFML1         | ENSG00000183801.7  | 1.325   | 8.434   | -2.021 | 6.31E-17 |
| HSPA2          | ENSG00000126803.9  | 5.295   | 24.59   | -2.023 | 5.20E-13 |
| PDE5A          | ENSG00000138735.15 | 2.31    | 12.449  | -2.023 | 3.77E-21 |
| PDE1A          | ENSG00000115252.18 | 0.61    | 5.55    | -2.024 | 2.97E-25 |
| TMEM220        | ENSG00000187824.8  | 0.87    | 6.605   | -2.024 | 1.54E-22 |
| CACNB2         | ENSG00000165995.18 | 0.58    | 5.437   | -2.027 | 9.10E-25 |
| C4B            | ENSG00000224389.8  | 17.63   | 74.989  | -2.028 | 7.06E-05 |
| ASPA           | ENSG00000108381.10 | 0.15    | 3.694   | -2.029 | 2.47E-35 |
| CCDC80         | ENSG00000091986.15 | 16.405  | 70.033  | -2.029 | 2.34E-07 |
| DENND2A        | ENSG00000146966.12 | 1.615   | 9.675   | -2.029 | 9.25E-15 |
| ADAMTS15       | ENSG00000166106.3  | 0.43    | 4.845   | -2.031 | 7.57E-10 |
| IFFO1          | ENSG00000010295.19 | 2.495   | 13.279  | -2.031 | 7.44E-11 |
| APOLD1         | ENSG00000178878.12 | 4.345   | 20.922  | -2.036 | 2.01E-18 |
| CSPG4          | ENSG00000173546.7  | 3.13    | 15.965  | -2.038 | 4.27E-08 |
| NFATC4         | ENSG00000100968.13 | 17.255  | 73.981  | -2.038 | 5.79E-08 |
| PLSCR4         | ENSG00000114698.14 | 2.27    | 12.429  | -2.038 | 8.67E-14 |
| PPP2R2B        | ENSG00000156475.18 | 2.295   | 12.537  | -2.038 | 1.08E-03 |
| ADCY2          | ENSG00000078295.15 | 0.195   | 3.915   | -2.04  | 4.94E-19 |
| ADRB3          | ENSG00000188778.4  | 0.04    | 3.28    | -2.041 | 4.41E-37 |
| TCEAL1         | ENSG00000172465.13 | 17.115  | 73.536  | -2.041 | 8.39E-16 |
| S1PR1          | ENSG00000170989.8  | 3.535   | 17.754  | -2.048 | 2.15E-14 |

|            |                    |        |         |        |          |
|------------|--------------------|--------|---------|--------|----------|
| SLC22A3    | ENSG00000146477.5  | 0.43   | 4.917   | -2.049 | 4.61E-10 |
| HEPH       | ENSG00000089472.16 | 2.02   | 11.517  | -2.051 | 3.02E-10 |
| RHOB       | ENSG00000143878.9  | 84.176 | 352.394 | -2.053 | 2.85E-19 |
| AKAP2      | ENSG00000241978.9  | 5.235  | 24.908  | -2.055 | 2.14E-10 |
| FRY        | ENSG00000073910.19 | 7.655  | 34.999  | -2.056 | 2.11E-08 |
| AF131217.1 | ENSG00000232855.6  | 0.05   | 3.368   | -2.057 | 2.46E-47 |
| RHOJ       | ENSG00000126785.12 | 1.77   | 10.53   | -2.057 | 4.41E-18 |
| TSC22D3    | ENSG00000157514.16 | 47.72  | 201.725 | -2.057 | 3.05E-13 |
| MT1A       | ENSG00000205362.10 | 0.86   | 6.738   | -2.057 | 2.42E-11 |
| MICU3      | ENSG00000155970.11 | 0.18   | 3.915   | -2.058 | 1.68E-43 |
| NCALD      | ENSG00000104490.17 | 1.96   | 11.335  | -2.059 | 1.06E-15 |
| GARNL3     | ENSG00000136895.18 | 2.19   | 12.315  | -2.061 | 6.51E-14 |
| TACC1      | ENSG00000147526.19 | 13.79  | 60.808  | -2.063 | 8.27E-10 |
| SOX17      | ENSG00000164736.5  | 0.75   | 6.314   | -2.063 | 1.94E-30 |
| NR2F1-AS1  | ENSG00000237187.8  | 2.815  | 14.952  | -2.064 | 4.30E-08 |
| MEF2C      | ENSG00000081189.13 | 2.15   | 12.19   | -2.066 | 2.58E-17 |
| NR4A2      | ENSG00000153234.13 | 3.3    | 17.009  | -2.066 | 6.83E-18 |
| ADHFE1     | ENSG00000147576.15 | 1.46   | 9.338   | -2.071 | 2.37E-12 |
| PCP4L1     | ENSG00000248485.1  | 5.64   | 26.945  | -2.073 | 9.71E-03 |
| MYZAP      | ENSG00000263155.5  | 7.5    | 34.768  | -2.073 | 5.21E-16 |
| CDKL1      | ENSG00000100490.9  | 1.17   | 8.134   | -2.074 | 1.25E-22 |
| MIR497HG   | ENSG00000267532.3  | 0.89   | 6.96    | -2.074 | 3.84E-23 |
| BDKRB2     | ENSG00000168398.6  | 3.39   | 17.508  | -2.076 | 2.70E-15 |
| KLF4       | ENSG00000136826.14 | 14.51  | 64.471  | -2.078 | 3.68E-15 |
| MCAM       | ENSG00000076706.14 | 24.75  | 107.892 | -2.08  | 1.36E-12 |
| IL6        | ENSG00000136244.11 | 3      | 15.914  | -2.08  | 9.30E-10 |
| EDNRA      | ENSG00000151617.15 | 1.91   | 11.359  | -2.086 | 1.81E-11 |
| CCDC60     | ENSG00000183273.6  | 0.2    | 4.105   | -2.089 | 3.30E-08 |
| HACD1      | ENSG00000165996.13 | 4.095  | 20.692  | -2.09  | 1.36E-07 |
| ZFPM2      | ENSG00000169946.13 | 0.48   | 5.32    | -2.094 | 1.23E-21 |
| LHFP       | ENSG00000183722.7  | 8.495  | 39.537  | -2.094 | 9.60E-11 |
| FAIM2      | ENSG00000135472.8  | 0.24   | 4.304   | -2.097 | 7.04E-26 |
| SVIL       | ENSG00000197321.14 | 14.4   | 64.886  | -2.097 | 3.31E-16 |
| ATF3       | ENSG00000162772.16 | 31.194 | 136.873 | -2.098 | 2.01E-10 |
| FOXP2      | ENSG00000128573.22 | 0.4    | 4.998   | -2.099 | 2.49E-24 |
| ANGPTL2    | ENSG00000136859.9  | 10.115 | 46.639  | -2.1   | 1.40E-06 |
| TPTEP1     | ENSG00000100181.21 | 0.7    | 6.309   | -2.104 | 2.47E-06 |
| FILIP1L    | ENSG00000168386.18 | 7.52   | 35.679  | -2.106 | 9.20E-15 |
| TMEM252    | ENSG00000181778.4  | 0.02   | 3.403   | -2.11  | 2.50E-46 |
| CORO6      | ENSG00000167549.18 | 0.99   | 7.603   | -2.112 | 9.75E-08 |
| STEAP4     | ENSG00000127954.12 | 1.26   | 8.767   | -2.112 | 2.63E-09 |
| PKIG       | ENSG00000168734.13 | 30.3   | 134.265 | -2.112 | 4.29E-16 |
| SGCE       | ENSG00000127990.15 | 8.215  | 38.928  | -2.115 | 5.43E-08 |
| CAV1       | ENSG00000105974.11 | 30.768 | 136.745 | -2.116 | 5.20E-07 |

|             |                    |        |         |        |          |
|-------------|--------------------|--------|---------|--------|----------|
| TSPAN18     | ENSG00000157570.11 | 2.155  | 12.684  | -2.117 | 1.84E-16 |
| GALNT15     | ENSG00000131386.17 | 0.445  | 5.295   | -2.123 | 9.09E-22 |
| KLHL13      | ENSG00000003096.13 | 0.785  | 6.793   | -2.126 | 1.76E-16 |
| KIAA0408    | ENSG00000189367.14 | 0.32   | 4.764   | -2.126 | 2.60E-29 |
| RBMS3       | ENSG00000144642.20 | 0.54   | 5.734   | -2.129 | 3.77E-21 |
| CD69        | ENSG00000110848.8  | 2.125  | 12.685  | -2.131 | 1.38E-06 |
| CTC-296K1.3 | ENSG00000267505.1  | 0.08   | 3.734   | -2.132 | 6.51E-36 |
| MXRA7       | ENSG00000182534.13 | 37.175 | 166.745 | -2.136 | 8.37E-16 |
| PCDH18      | ENSG00000189184.11 | 1.385  | 9.486   | -2.136 | 8.26E-14 |
| GFRA1       | ENSG00000151892.14 | 0.1    | 3.843   | -2.138 | 4.95E-35 |
| CSRNP1      | ENSG00000144655.14 | 11.375 | 53.548  | -2.14  | 4.44E-21 |
| NBEA        | ENSG00000172915.18 | 0.515  | 5.683   | -2.141 | 6.71E-21 |
| AC053503.12 | ENSG00000280323.1  | 0.01   | 3.458   | -2.142 | 9.33E-34 |
| PRDM8       | ENSG00000152784.15 | 0.725  | 6.62    | -2.143 | 2.34E-16 |
| DPYSL3      | ENSG00000113657.12 | 13.475 | 62.983  | -2.144 | 9.60E-09 |
| EPHX2       | ENSG00000120915.13 | 4.64   | 23.929  | -2.144 | 3.04E-12 |
| ZNF667-AS1  | ENSG00000166770.10 | 5.03   | 25.714  | -2.147 | 2.77E-05 |
| MITF        | ENSG00000187098.14 | 1.205  | 8.768   | -2.147 | 3.96E-16 |
| VIPR2       | ENSG00000106018.13 | 0.09   | 3.836   | -2.149 | 1.07E-52 |
| UTRN        | ENSG00000152818.18 | 3.69   | 19.866  | -2.153 | 7.31E-12 |
| AXL         | ENSG00000167601.11 | 5.365  | 27.357  | -2.155 | 5.74E-07 |
| LDB3        | ENSG00000122367.19 | 0.2    | 4.355   | -2.158 | 1.48E-33 |
| SERPINF1    | ENSG00000132386.10 | 49.755 | 225.595 | -2.158 | 3.83E-06 |
| CCND2       | ENSG00000118971.7  | 3.615  | 19.613  | -2.159 | 1.91E-10 |
| RPS6KA2     | ENSG00000071242.11 | 4.05   | 21.552  | -2.159 | 8.04E-16 |
| NID1        | ENSG00000116962.14 | 11.634 | 55.452  | -2.16  | 1.52E-04 |
| EPHA3       | ENSG00000044524.10 | 0.585  | 6.087   | -2.161 | 2.40E-23 |
| CREB5       | ENSG00000146592.16 | 0.635  | 6.324   | -2.163 | 3.13E-22 |
| THRA        | ENSG00000126351.12 | 7.405  | 36.662  | -2.164 | 1.02E-15 |
| CLDN11      | ENSG00000013297.10 | 1.615  | 10.782  | -2.172 | 3.16E-05 |
| SVEP1       | ENSG00000165124.17 | 0.57   | 6.103   | -2.178 | 1.45E-35 |
| COL21A1     | ENSG00000124749.16 | 0.525  | 5.919   | -2.182 | 9.23E-23 |
| EPB41L2     | ENSG00000079819.16 | 6.98   | 35.221  | -2.182 | 1.17E-10 |
| RBPMs       | ENSG00000157110.15 | 57.573 | 264.854 | -2.182 | 2.79E-11 |
| PLIN4       | ENSG00000167676.4  | 3.03   | 17.319  | -2.184 | 3.65E-14 |
| RASD1       | ENSG00000108551.4  | 2.135  | 13.252  | -2.185 | 8.75E-10 |
| FAM110B     | ENSG00000169122.11 | 0.65   | 6.525   | -2.189 | 2.23E-16 |
| DAAM2       | ENSG00000146122.16 | 1.075  | 8.471   | -2.19  | 2.68E-16 |
| GHR         | ENSG00000112964.13 | 0.22   | 4.565   | -2.19  | 4.74E-27 |
| LIFR        | ENSG00000113594.9  | 1.065  | 8.425   | -2.19  | 7.18E-19 |
| NRG2        | ENSG00000158458.19 | 0.28   | 4.85    | -2.192 | 6.10E-13 |
| EDNRB       | ENSG00000136160.14 | 1.56   | 10.705  | -2.193 | 6.58E-16 |
| MEIS1       | ENSG00000143995.19 | 6.84   | 34.839  | -2.193 | 1.14E-17 |
| OMD         | ENSG00000127083.7  | 0.09   | 4.005   | -2.199 | 1.84E-22 |

|                |                    |         |          |        |          |
|----------------|--------------------|---------|----------|--------|----------|
| STARD9         | ENSG00000159433.11 | 0.475   | 5.773    | -2.199 | 6.59E-32 |
| BMP4           | ENSG00000125378.15 | 3.765   | 20.933   | -2.203 | 3.42E-04 |
| C3             | ENSG00000125730.16 | 123.677 | 573.344  | -2.204 | 1.73E-06 |
| PDZD4          | ENSG00000067840.12 | 0.36    | 5.28     | -2.207 | 4.83E-23 |
| CYTL1          | ENSG00000170891.10 | 0.68    | 6.77     | -2.209 | 3.06E-15 |
| IGF1           | ENSG00000017427.15 | 0.575   | 6.282    | -2.209 | 1.05E-09 |
| MAP1A          | ENSG00000166963.12 | 0.775   | 7.228    | -2.213 | 9.24E-21 |
| TSPAN2         | ENSG00000134198.9  | 2.6     | 15.704   | -2.214 | 6.30E-12 |
| GAS1           | ENSG00000180447.6  | 2.12    | 13.48    | -2.214 | 3.27E-05 |
| LMCD1          | ENSG00000071282.11 | 16.845  | 82.241   | -2.222 | 2.14E-08 |
| CD34           | ENSG00000174059.16 | 11.38   | 56.828   | -2.224 | 2.35E-19 |
| SNHG14         | ENSG00000224078.12 | 5.545   | 29.754   | -2.232 | 7.34E-09 |
| TIMP2          | ENSG00000035862.12 | 47.05   | 225.713  | -2.238 | 9.69E-06 |
| SELENBP1       | ENSG00000143416.20 | 14.36   | 71.495   | -2.239 | 1.78E-06 |
| SFRP2          | ENSG00000145423.4  | 17.6    | 86.776   | -2.239 | 1.09E-04 |
| FGF2           | ENSG00000138685.12 | 0.33    | 5.29     | -2.242 | 2.18E-28 |
| SELM           | ENSG00000198832.10 | 60.675  | 291.227  | -2.244 | 1.24E-08 |
| COL6A1         | ENSG00000142156.14 | 83.372  | 399.139  | -2.246 | 6.67E-05 |
| ROR2           | ENSG00000169071.14 | 2.035   | 13.412   | -2.248 | 9.00E-10 |
| GULP1          | ENSG00000144366.15 | 1.825   | 12.426   | -2.249 | 4.30E-12 |
| CX3CL1         | ENSG00000006210.6  | 5.38    | 29.371   | -2.251 | 1.60E-07 |
| HSPB2-C11orf52 | ENSG00000254445.1  | 0.53    | 6.29     | -2.252 | 7.04E-22 |
| EVA1C          | ENSG00000166979.12 | 8.98    | 46.618   | -2.254 | 3.50E-10 |
| PTH1R          | ENSG00000160801.13 | 0.605   | 6.67     | -2.257 | 2.45E-23 |
| EML1           | ENSG00000066629.16 | 2.435   | 15.442   | -2.259 | 1.80E-13 |
| C15orf59       | ENSG00000205363.5  | 0.845   | 7.846    | -2.261 | 1.66E-13 |
| SLC24A3        | ENSG00000185052.11 | 1.525   | 11.1     | -2.261 | 1.10E-16 |
| EBF1           | ENSG00000164330.16 | 0.69    | 7.104    | -2.262 | 1.69E-27 |
| NEURL1         | ENSG00000107954.10 | 0.31    | 5.283    | -2.262 | 1.86E-13 |
| GRASP          | ENSG00000161835.10 | 3.815   | 22.11    | -2.263 | 2.93E-16 |
| RGN            | ENSG00000130988.12 | 0.43    | 5.867    | -2.264 | 1.93E-16 |
| RGMA           | ENSG00000182175.13 | 0.82    | 7.745    | -2.265 | 6.74E-08 |
| DUSP2          | ENSG00000158050.4  | 11      | 56.73    | -2.266 | 3.62E-03 |
| FLNA           | ENSG00000196924.14 | 373.107 | 1806.147 | -2.272 | 3.18E-12 |
| GPIHBP1        | ENSG00000277494.1  | 0.31    | 5.332    | -2.273 | 5.68E-31 |
| SPRY1          | ENSG00000164056.10 | 12.685  | 65.483   | -2.28  | 7.00E-17 |
| PLCD4          | ENSG00000115556.13 | 0.54    | 6.49     | -2.282 | 8.04E-39 |
| GNAO1          | ENSG00000087258.13 | 0.39    | 5.775    | -2.285 | 5.89E-23 |
| TSHZ3          | ENSG00000121297.6  | 1.24    | 9.925    | -2.286 | 5.68E-15 |
| TUB            | ENSG00000166402.8  | 0.44    | 6.024    | -2.286 | 3.37E-20 |
| MASP1          | ENSG00000127241.16 | 0.17    | 4.714    | -2.288 | 1.99E-35 |
| HAAO           | ENSG00000162882.14 | 3.465   | 20.818   | -2.289 | 4.46E-19 |
| ZEB2           | ENSG00000169554.16 | 3.155   | 19.346   | -2.292 | 3.72E-15 |
| INMT           | ENSG00000241644.2  | 1.035   | 8.97     | -2.293 | 2.13E-18 |



|              |                    |        |         |        |          |
|--------------|--------------------|--------|---------|--------|----------|
| BTG2         | ENSG00000159388.5  | 86.9   | 431.413 | -2.298 | 2.08E-09 |
| CCL21        | ENSG00000137077.7  | 3.75   | 22.379  | -2.299 | 2.28E-04 |
| ALDH2        | ENSG00000111275.12 | 23.475 | 119.518 | -2.3   | 8.06E-11 |
| NR3C2        | ENSG00000151623.14 | 0.34   | 5.6     | -2.3   | 1.43E-29 |
| CTGF         | ENSG00000118523.5  | 35.226 | 177.486 | -2.301 | 9.01E-11 |
| ATP8B2       | ENSG00000143515.16 | 3.17   | 19.584  | -2.303 | 8.29E-10 |
| PDE1C        | ENSG00000154678.16 | 0.17   | 4.777   | -2.304 | 6.00E-37 |
| FZD7         | ENSG00000155760.2  | 4.875  | 28.051  | -2.306 | 4.15E-15 |
| LRFN5        | ENSG00000165379.13 | 0.1    | 4.45    | -2.309 | 6.59E-32 |
| NFIX         | ENSG00000008441.16 | 8.06   | 44.012  | -2.313 | 6.87E-16 |
| WFDC1        | ENSG00000103175.10 | 6.205  | 34.835  | -2.314 | 4.88E-16 |
| ADAMTSL4     | ENSG00000143382.13 | 7.175  | 39.682  | -2.315 | 1.39E-05 |
| DCHS1        | ENSG00000166341.7  | 1.205  | 9.968   | -2.315 | 2.93E-17 |
| PRKCB        | ENSG00000166501.12 | 0.69   | 7.429   | -2.318 | 1.10E-20 |
| STARD13      | ENSG00000133121.20 | 1.66   | 12.274  | -2.319 | 1.00E-19 |
| ITPR1        | ENSG00000150995.17 | 3.34   | 20.667  | -2.32  | 6.89E-22 |
| KCNMA1       | ENSG00000156113.20 | 1.87   | 13.368  | -2.324 | 8.00E-17 |
| NOVA1        | ENSG00000139910.19 | 0.23   | 5.179   | -2.329 | 5.17E-25 |
| RP11-887P2.5 | ENSG00000258274.1  | 0.02   | 4.13    | -2.33  | 1.59E-49 |
| TSPYL2       | ENSG00000184205.14 | 10.26  | 55.746  | -2.333 | 9.98E-23 |
| SEPP1        | ENSG00000250722.5  | 29.389 | 152.339 | -2.335 | 1.27E-07 |
| ALDH1A1      | ENSG00000165092.12 | 4.225  | 25.385  | -2.336 | 1.35E-05 |
| PTGFR        | ENSG00000122420.9  | 0.18   | 4.965   | -2.338 | 2.78E-32 |
| ABCA6        | ENSG00000154262.12 | 0.945  | 8.843   | -2.339 | 1.98E-06 |
| MIR4697HG    | ENSG00000280237.1  | 0.115  | 4.648   | -2.341 | 6.52E-33 |
| P2RY14       | ENSG00000174944.8  | 0.375  | 5.975   | -2.343 | 4.60E-36 |
| ANXA6        | ENSG00000197043.13 | 29.675 | 155.007 | -2.346 | 4.90E-11 |
| MEIS2        | ENSG00000134138.19 | 6.105  | 35.209  | -2.349 | 8.37E-15 |
| RGS5         | ENSG00000143248.12 | 13.919 | 75.058  | -2.35  | 2.08E-14 |
| DNAJB5       | ENSG00000137094.14 | 3.675  | 22.85   | -2.351 | 4.84E-18 |
| GAS7         | ENSG00000007237.18 | 1.55   | 12.025  | -2.353 | 1.26E-15 |
| ST8SIA1      | ENSG00000111728.10 | 0.74   | 7.889   | -2.353 | 1.34E-14 |
| CTSG         | ENSG00000100448.3  | 0.555  | 6.957   | -2.355 | 2.81E-14 |
| FAM149A      | ENSG00000109794.13 | 2.005  | 14.382  | -2.356 | 1.21E-11 |
| TMTC1        | ENSG00000133687.15 | 0.85   | 8.514   | -2.363 | 4.82E-12 |
| FKBP5        | ENSG00000096060.14 | 9.729  | 54.306  | -2.366 | 2.54E-08 |
| NPR1         | ENSG00000169418.9  | 1.375  | 11.29   | -2.371 | 3.26E-16 |
| C1S          | ENSG00000182326.14 | 70.889 | 371.057 | -2.372 | 3.64E-06 |
| LPP          | ENSG00000145012.12 | 6.69   | 38.848  | -2.373 | 5.23E-22 |
| FBXL22       | ENSG00000197361.6  | 0.76   | 8.142   | -2.377 | 2.20E-26 |
| PRICKLE2     | ENSG00000163637.11 | 1.355  | 11.296  | -2.384 | 5.70E-27 |
| FILIP1       | ENSG00000118407.14 | 0.35   | 6.085   | -2.392 | 6.66E-35 |
| EPHA7        | ENSG00000135333.13 | 0.225  | 5.436   | -2.393 | 2.09E-25 |
| HSPB2        | ENSG00000170276.5  | 0.82   | 8.575   | -2.395 | 1.30E-20 |

|                |                    |         |         |        |          |
|----------------|--------------------|---------|---------|--------|----------|
| LCN6           | ENSG00000267206.5  | 0.11    | 4.837   | -2.395 | 3.67E-33 |
| GNG7           | ENSG00000176533.12 | 0.49    | 6.844   | -2.396 | 1.58E-35 |
| RGAG4          | ENSG00000242732.4  | 0.61    | 7.488   | -2.398 | 6.84E-19 |
| RRAD           | ENSG00000166592.11 | 3.05    | 20.357  | -2.399 | 7.93E-06 |
| ZDHHC11B       | ENSG00000206077.10 | 0.295   | 5.836   | -2.4   | 6.06E-17 |
| MYADM          | ENSG00000179820.15 | 19.575  | 107.675 | -2.401 | 7.46E-13 |
| RERG           | ENSG00000134533.6  | 1.205   | 10.658  | -2.402 | 3.36E-16 |
| ADAMTSL3       | ENSG00000156218.12 | 0.115   | 4.937   | -2.413 | 7.18E-49 |
| APBB1          | ENSG00000166313.18 | 4.34    | 27.436  | -2.413 | 7.00E-14 |
| TGFB1I1        | ENSG00000140682.18 | 14.14   | 79.807  | -2.416 | 2.17E-15 |
| pk             | ENSG00000091436.16 | 6.97    | 41.664  | -2.42  | 6.83E-18 |
| ID4            | ENSG00000172201.10 | 4.67    | 29.442  | -2.425 | 5.83E-07 |
| GAS6           | ENSG00000183087.14 | 23.835  | 133.255 | -2.434 | 2.05E-08 |
| RP11-56G10.2   | ENSG00000257386.1  | 0       | 4.405   | -2.434 | 4.56E-03 |
| ARMCX1         | ENSG00000126947.11 | 2.635   | 18.684  | -2.437 | 6.16E-12 |
| PDGFRA         | ENSG00000134853.11 | 3.585   | 23.858  | -2.439 | 4.50E-13 |
| RP11-64B16.2   | ENSG00000213144.2  | 0.92    | 9.427   | -2.441 | 1.11E-21 |
| SOBP           | ENSG00000112320.11 | 0.48    | 7.074   | -2.448 | 1.02E-32 |
| TPSD1          | ENSG00000095917.13 | 0.14    | 5.232   | -2.451 | 5.73E-19 |
| NR2F1          | ENSG00000175745.11 | 4.255   | 27.789  | -2.454 | 1.64E-13 |
| SLC8A1         | ENSG00000183023.18 | 0.58    | 7.726   | -2.465 | 5.08E-21 |
| RP11-867G23.10 | ENSG00000254510.1  | 0.15    | 5.354   | -2.466 | 1.07E-45 |
| FGF10          | ENSG00000070193.4  | 0.05    | 4.814   | -2.469 | 2.02E-43 |
| LYNX1          | ENSG00000180155.18 | 3.34    | 23.084  | -2.472 | 2.06E-03 |
| IGSF10         | ENSG00000152580.8  | 0.13    | 5.28    | -2.474 | 1.66E-28 |
| PELI2          | ENSG00000139946.9  | 0.825   | 9.208   | -2.484 | 8.24E-25 |
| EGR3           | ENSG00000179388.8  | 1.045   | 10.447  | -2.485 | 5.83E-21 |
| TCEAL7         | ENSG00000182916.7  | 0.885   | 9.558   | -2.486 | 6.02E-23 |
| PALM           | ENSG00000099864.17 | 2.87    | 20.792  | -2.493 | 1.97E-07 |
| PCDH7          | ENSG00000169851.15 | 2.075   | 16.307  | -2.493 | 1.50E-08 |
| RASL11A        | ENSG00000122035.6  | 3.55    | 24.678  | -2.497 | 2.67E-15 |
| FERMT2         | ENSG00000073712.13 | 7.145   | 45.092  | -2.501 | 5.70E-18 |
| MBNL1-AS1      | ENSG00000229619.3  | 0.76    | 8.961   | -2.501 | 5.29E-27 |
| GSN            | ENSG00000148180.16 | 157.062 | 898.079 | -2.508 | 1.32E-20 |
| ITGA5          | ENSG00000161638.10 | 31.83   | 185.827 | -2.509 | 5.90E-12 |
| BIN1           | ENSG00000136717.14 | 11.325  | 69.317  | -2.512 | 7.91E-13 |
| CSRP1          | ENSG00000159176.13 | 110.744 | 636.738 | -2.513 | 5.84E-25 |
| GNAL           | ENSG00000141404.15 | 0.83    | 9.443   | -2.513 | 1.92E-28 |
| F13A1          | ENSG00000124491.15 | 2.585   | 19.497  | -2.515 | 1.95E-10 |
| C8orf88        | ENSG00000253250.2  | 0.885   | 9.864   | -2.527 | 9.57E-14 |
| F3             | ENSG00000117525.13 | 11.165  | 69.276  | -2.53  | 1.63E-04 |
| NXPH3          | ENSG00000182575.7  | 0.72    | 8.937   | -2.53  | 2.55E-21 |
| RIC3           | ENSG00000166405.14 | 0.37    | 6.936   | -2.534 | 1.25E-18 |
| RERGL          | ENSG00000111404.6  | 0.19    | 5.914   | -2.539 | 3.93E-44 |

|               |                    |         |          |        |          |
|---------------|--------------------|---------|----------|--------|----------|
| PRKAR2B       | ENSG00000005249.12 | 1.595   | 14.117   | -2.542 | 4.07E-16 |
| LRRN4CL       | ENSG00000177363.4  | 0.58    | 8.223    | -2.545 | 7.26E-29 |
| TNS2          | ENSG00000111077.17 | 10.275  | 64.906   | -2.547 | 4.56E-24 |
| TMEM35        | ENSG00000126950.7  | 0.23    | 6.196    | -2.548 | 4.11E-19 |
| CPXM2         | ENSG00000121898.12 | 1.885   | 15.92    | -2.552 | 5.01E-12 |
| MGLL          | ENSG00000074416.13 | 6.42    | 42.545   | -2.553 | 1.44E-15 |
| PMP22         | ENSG00000109099.13 | 23.574  | 143.444  | -2.555 | 1.57E-11 |
| XPNPEP2       | ENSG00000122121.10 | 0.07    | 5.325    | -2.563 | 1.06E-32 |
| FBLN2         | ENSG00000163520.13 | 8.48    | 55.228   | -2.568 | 2.90E-09 |
| CHRD12        | ENSG00000054938.15 | 1.665   | 14.874   | -2.574 | 4.74E-04 |
| RBP4          | ENSG00000138207.12 | 0.85    | 10.034   | -2.576 | 7.81E-05 |
| CPEB1         | ENSG00000214575.9  | 0.16    | 5.92     | -2.577 | 9.36E-38 |
| GLP2R         | ENSG00000065325.12 | 0.05    | 5.268    | -2.578 | 8.74E-56 |
| TNFAIP8L3     | ENSG00000183578.5  | 1.085   | 11.467   | -2.58  | 5.59E-22 |
| VSTM4         | ENSG00000165633.12 | 1.02    | 11.165   | -2.59  | 2.11E-25 |
| FAM189A2      | ENSG00000135063.17 | 1.01    | 11.111   | -2.591 | 9.02E-25 |
| COL6A2        | ENSG00000142173.14 | 101.539 | 617.309  | -2.592 | 1.63E-06 |
| ANK2          | ENSG00000145362.16 | 0.515   | 8.155    | -2.595 | 7.59E-27 |
| TMEM100       | ENSG00000166292.11 | 0.295   | 6.83     | -2.596 | 1.62E-27 |
| BCHE          | ENSG00000114200.9  | 0.32    | 7.001    | -2.6   | 1.01E-17 |
| C20orf166-AS1 | ENSG00000174403.15 | 0.04    | 5.315    | -2.602 | 1.13E-42 |
| FBXL7         | ENSG00000183580.9  | 1.13    | 11.964   | -2.606 | 6.16E-24 |
| PDZRN4        | ENSG00000165966.14 | 0.07    | 5.532    | -2.61  | 6.29E-35 |
| CSDC2         | ENSG00000172346.14 | 0.575   | 8.634    | -2.613 | 4.00E-13 |
| MFAP5         | ENSG00000197614.10 | 2.535   | 20.703   | -2.618 | 8.93E-09 |
| LTBP4         | ENSG00000090006.17 | 35.1    | 220.876  | -2.62  | 2.83E-18 |
| LGI4          | ENSG00000153902.13 | 1.12    | 12.04    | -2.621 | 4.77E-33 |
| LAMC3         | ENSG00000050555.17 | 3.375   | 25.96    | -2.623 | 3.66E-13 |
| RP11-903H12.5 | ENSG00000259171.1  | 2.73    | 22.047   | -2.627 | 1.64E-17 |
| PITX2         | ENSG00000164093.15 | 2.62    | 21.481   | -2.635 | 1.43E-11 |
| CPED1         | ENSG00000106034.17 | 0.87    | 10.623   | -2.636 | 3.33E-29 |
| SDC2          | ENSG00000169439.11 | 13.79   | 91.075   | -2.638 | 4.81E-08 |
| CCDC69        | ENSG00000198624.12 | 8.235   | 56.976   | -2.65  | 2.07E-25 |
| COLEC12       | ENSG00000158270.11 | 0.91    | 10.99    | -2.65  | 3.16E-13 |
| MMRN1         | ENSG00000138722.9  | 0.27    | 6.979    | -2.651 | 2.41E-25 |
| POPDC2        | ENSG00000121577.13 | 1.6     | 15.339   | -2.652 | 2.86E-20 |
| OSR1          | ENSG00000143867.6  | 6.125   | 44.009   | -2.659 | 1.25E-06 |
| CCL15-CCL14   | ENSG00000275688.4  | 0.92    | 11.144   | -2.661 | 7.80E-04 |
| KCND3         | ENSG00000171385.9  | 0.33    | 7.42     | -2.662 | 3.59E-30 |
| PHYHD1        | ENSG00000175287.18 | 3.015   | 24.479   | -2.666 | 2.52E-11 |
| SYNE1         | ENSG00000131018.22 | 4.395   | 33.283   | -2.668 | 1.74E-21 |
| PRDM6         | ENSG00000061455.10 | 0.475   | 8.388    | -2.67  | 3.60E-31 |
| CLU           | ENSG00000120885.19 | 263.561 | 1687.825 | -2.674 | 6.70E-08 |
| SBSPON        | ENSG00000164764.10 | 0.855   | 10.917   | -2.683 | 1.33E-17 |

|              |                    |         |         |        |          |
|--------------|--------------------|---------|---------|--------|----------|
| ACOX2        | ENSG00000168306.12 | 1.07    | 12.331  | -2.687 | 4.58E-24 |
| KIAA1644     | ENSG00000138944.7  | 0.17    | 6.534   | -2.687 | 1.41E-33 |
| OLFML3       | ENSG00000116774.11 | 8.034   | 57.245  | -2.689 | 1.88E-10 |
| PARM1        | ENSG00000169116.11 | 4.379   | 33.738  | -2.691 | 7.13E-13 |
| PTGDS        | ENSG00000107317.11 | 20.15   | 135.832 | -2.694 | 3.06E-08 |
| PLCB4        | ENSG00000101333.16 | 0.58    | 9.275   | -2.701 | 7.85E-22 |
| TPPP         | ENSG00000171368.11 | 0.4     | 8.117   | -2.703 | 2.78E-36 |
| CPA3         | ENSG00000163751.3  | 1.86    | 17.663  | -2.706 | 9.22E-12 |
| STXBP6       | ENSG00000168952.15 | 0.56    | 9.25    | -2.716 | 1.42E-08 |
| JAM2         | ENSG00000154721.14 | 1.39    | 14.842  | -2.729 | 3.65E-28 |
| TGFBR3       | ENSG00000069702.10 | 4.995   | 38.794  | -2.731 | 8.97E-16 |
| PRIMA1       | ENSG00000175785.12 | 0.12    | 6.435   | -2.731 | 1.09E-39 |
| FOS          | ENSG00000170345.9  | 138.217 | 925.657 | -2.735 | 6.42E-13 |
| CLDN5        | ENSG00000184113.9  | 5.88    | 44.849  | -2.736 | 3.77E-16 |
| JPH2         | ENSG00000149596.6  | 1.03    | 12.531  | -2.737 | 9.46E-18 |
| ARHGEF25     | ENSG00000240771.6  | 6.65    | 50.13   | -2.741 | 1.97E-15 |
| TPM1         | ENSG00000140416.19 | 105.163 | 711.702 | -2.747 | 1.25E-18 |
| CKB          | ENSG00000166165.12 | 70.531  | 480.552 | -2.751 | 4.83E-13 |
| NNAT         | ENSG00000053438.8  | 0.81    | 11.214  | -2.754 | 1.36E-06 |
| PER1         | ENSG00000179094.13 | 13.355  | 95.862  | -2.754 | 1.58E-21 |
| COX7A1       | ENSG00000161281.10 | 16.195  | 115.587 | -2.761 | 9.89E-19 |
| GATA6        | ENSG00000141448.8  | 1.13    | 13.57   | -2.774 | 1.68E-26 |
| AFF3         | ENSG00000144218.18 | 0.12    | 6.677   | -2.777 | 9.71E-37 |
| GATA5        | ENSG00000130700.6  | 0.07    | 6.362   | -2.783 | 3.66E-31 |
| COL4A6       | ENSG00000197565.15 | 3.76    | 31.78   | -2.784 | 2.73E-11 |
| PPP1R1B      | ENSG00000131771.13 | 2.125   | 20.669  | -2.794 | 5.25E-04 |
| ZCCHC24      | ENSG00000165424.6  | 2.92    | 26.195  | -2.794 | 1.30E-21 |
| CSGALNACT1   | ENSG00000147408.14 | 2.22    | 21.366  | -2.796 | 7.23E-27 |
| RNASE4       | ENSG00000258818.3  | 6.2     | 49.021  | -2.796 | 1.91E-20 |
| RP11-498E2.9 | ENSG00000269970.1  | 0       | 5.948   | -2.797 | 9.01E-26 |
| CELF2        | ENSG00000048740.17 | 1.2     | 14.304  | -2.798 | 1.57E-23 |
| REEP1        | ENSG00000068615.16 | 0.32    | 8.186   | -2.799 | 3.56E-23 |
| CBX7         | ENSG00000100307.12 | 6.47    | 51.101  | -2.802 | 3.59E-29 |
| CXCL12       | ENSG00000107562.16 | 5.56    | 44.749  | -2.802 | 1.80E-13 |
| SLIT2        | ENSG00000145147.19 | 0.52    | 9.608   | -2.803 | 2.20E-26 |
| EMILIN1      | ENSG00000138080.13 | 16.725  | 123.021 | -2.807 | 2.00E-07 |
| A2M          | ENSG00000175899.14 | 71.629  | 509.627 | -2.814 | 3.70E-16 |
| RAMP1        | ENSG00000132329.10 | 7.695   | 60.225  | -2.816 | 2.10E-12 |
| MT1M         | ENSG00000205364.3  | 1.09    | 13.75   | -2.819 | 4.66E-10 |
| ZEB1         | ENSG00000148516.21 | 2.23    | 21.817  | -2.82  | 8.23E-22 |
| WBSCR17      | ENSG00000185274.11 | 0.255   | 7.884   | -2.823 | 3.17E-30 |
| C16orf45     | ENSG00000166780.10 | 5.29    | 43.825  | -2.833 | 9.04E-15 |
| ASB2         | ENSG00000100628.11 | 1.075   | 13.82   | -2.836 | 6.00E-28 |
| FGL2         | ENSG00000127951.5  | 2.345   | 22.907  | -2.837 | 2.70E-23 |

|             |                    |         |         |        |          |
|-------------|--------------------|---------|---------|--------|----------|
| AKAP12      | ENSG00000131016.16 | 3.305   | 29.774  | -2.838 | 1.07E-15 |
| ZFP36       | ENSG00000128016.5  | 127.707 | 919.304 | -2.838 | 2.76E-18 |
| ATOH8       | ENSG00000168874.12 | 2.275   | 22.559  | -2.847 | 4.02E-06 |
| TWIST2      | ENSG00000233608.3  | 0.85    | 12.35   | -2.851 | 4.29E-16 |
| TSPAN7      | ENSG00000156298.12 | 3.05    | 28.34   | -2.857 | 2.08E-11 |
| DIXDC1      | ENSG00000150764.13 | 1.55    | 17.482  | -2.858 | 1.77E-27 |
| PHYHIP      | ENSG00000168490.13 | 0.555   | 10.274  | -2.858 | 1.09E-29 |
| CNRIP1      | ENSG00000119865.8  | 2.275   | 22.795  | -2.861 | 1.42E-19 |
| PALLD       | ENSG00000129116.17 | 28.665  | 215.299 | -2.866 | 7.15E-18 |
| PYGM        | ENSG00000068976.13 | 0.33    | 8.71    | -2.868 | 4.36E-44 |
| CYBRD1      | ENSG00000071967.11 | 8.515   | 68.977  | -2.879 | 1.25E-13 |
| C1QTNF7     | ENSG00000163145.12 | 0.27    | 8.369   | -2.883 | 2.63E-52 |
| CFL2        | ENSG00000165410.14 | 7.065   | 58.509  | -2.883 | 3.38E-21 |
| EGR1        | ENSG00000120738.7  | 42.535  | 320.117 | -2.883 | 4.93E-13 |
| TACR2       | ENSG00000075073.14 | 0.425   | 9.509   | -2.883 | 1.85E-25 |
| MGP         | ENSG00000111341.9  | 96.867  | 721.521 | -2.884 | 2.97E-08 |
| SPEG        | ENSG00000072195.14 | 3.625   | 33.159  | -2.885 | 4.26E-14 |
| TMOD1       | ENSG00000136842.13 | 1.82    | 19.93   | -2.892 | 1.05E-25 |
| AQP1        | ENSG00000240583.10 | 25.64   | 197.096 | -2.895 | 3.18E-21 |
| ANTXR2      | ENSG00000163297.16 | 11.01   | 88.62   | -2.9   | 2.19E-16 |
| IGFBP6      | ENSG00000167779.7  | 25.114  | 195.054 | -2.908 | 1.11E-08 |
| ARHGAP6     | ENSG00000047648.21 | 0.68    | 11.633  | -2.911 | 1.13E-17 |
| LAMA2       | ENSG00000196569.11 | 1.49    | 17.8    | -2.916 | 1.35E-23 |
| KCNH2       | ENSG00000055118.14 | 0.48    | 10.178  | -2.917 | 1.91E-19 |
| NEXN        | ENSG00000162614.18 | 2.705   | 26.983  | -2.917 | 5.37E-22 |
| PLP1        | ENSG00000123560.13 | 0.07    | 7.085   | -2.918 | 7.39E-63 |
| CYR61       | ENSG00000142871.15 | 46.165  | 355.611 | -2.919 | 5.75E-14 |
| CLIP3       | ENSG00000105270.14 | 2.735   | 27.389  | -2.926 | 3.42E-19 |
| MEG3        | ENSG00000214548.14 | 4.505   | 40.824  | -2.926 | 4.45E-09 |
| KLF9        | ENSG00000119138.4  | 4.155   | 38.195  | -2.927 | 1.36E-23 |
| GPRASP1     | ENSG00000198932.12 | 0.64    | 11.49   | -2.929 | 1.07E-39 |
| PPAP2B      | ENSG00000162407.8  | 13.465  | 109.235 | -2.93  | 1.91E-23 |
| CHRM2       | ENSG00000181072.11 | 0.035   | 6.901   | -2.932 | 3.24E-39 |
| AGTR1       | ENSG00000144891.17 | 0.205   | 8.317   | -2.951 | 7.74E-34 |
| GSTM5       | ENSG00000134201.10 | 1.295   | 16.825  | -2.957 | 3.06E-11 |
| CRYM        | ENSG00000103316.10 | 0.725   | 12.408  | -2.958 | 1.49E-14 |
| C5orf66-AS1 | ENSG00000249082.2  | 0.37    | 9.67    | -2.961 | 3.79E-33 |
| SMTN        | ENSG00000183963.18 | 31.474  | 252.574 | -2.965 | 1.04E-26 |
| SLC2A4      | ENSG00000181856.14 | 0.22    | 8.602   | -2.976 | 1.68E-41 |
| LINC00865   | ENSG00000232229.5  | 1.765   | 20.774  | -2.977 | 5.15E-21 |
| FAXDC2      | ENSG00000170271.10 | 1.545   | 19.053  | -2.978 | 9.48E-33 |
| PAMR1       | ENSG00000149090.11 | 2.26    | 24.899  | -2.99  | 3.33E-25 |
| GEM         | ENSG00000164949.7  | 4.19    | 40.36   | -2.994 | 1.83E-20 |
| KLF2        | ENSG00000127528.5  | 5.245   | 48.858  | -2.997 | 1.15E-27 |

|             |                    |         |         |        |          |
|-------------|--------------------|---------|---------|--------|----------|
| GYPC        | ENSG00000136732.14 | 8.41    | 74.125  | -2.997 | 3.04E-14 |
| DMD         | ENSG00000198947.14 | 0.95    | 14.655  | -3.005 | 6.94E-22 |
| STON1       | ENSG00000243244.5  | 1.72    | 20.837  | -3.005 | 9.21E-24 |
| CALD1       | ENSG00000122786.19 | 39.53   | 325.892 | -3.012 | 1.67E-13 |
| TCF21       | ENSG00000118526.6  | 0.725   | 12.928  | -3.013 | 4.31E-44 |
| ELN         | ENSG00000049540.16 | 5.965   | 55.308  | -3.015 | 6.43E-11 |
| SLIT3       | ENSG00000184347.14 | 3.4     | 34.724  | -3.021 | 1.16E-20 |
| SERPINA3    | ENSG00000196136.16 | 1.05    | 15.668  | -3.023 | 6.58E-08 |
| DACT3       | ENSG00000197380.10 | 1.14    | 16.406  | -3.024 | 1.21E-22 |
| FGF7        | ENSG00000140285.9  | 1.815   | 21.94   | -3.027 | 4.54E-15 |
| ITGA7       | ENSG00000135424.15 | 4.08    | 40.626  | -3.035 | 9.06E-18 |
| ADGRA2      | ENSG00000020181.17 | 4.1     | 40.84   | -3.036 | 3.02E-16 |
| CRISPLD2    | ENSG00000103196.11 | 8.25    | 74.975  | -3.038 | 4.22E-15 |
| MAGI2-AS3   | ENSG00000234456.7  | 1.78    | 22.138  | -3.057 | 5.98E-19 |
| MATN2       | ENSG00000132561.13 | 9.545   | 86.991  | -3.061 | 9.25E-14 |
| AKR1B10     | ENSG00000198074.9  | 2.785   | 30.637  | -3.063 | 1.93E-03 |
| KANK2       | ENSG00000197256.10 | 19.745  | 172.396 | -3.063 | 2.91E-22 |
| ITM2A       | ENSG00000078596.10 | 3.215   | 34.354  | -3.068 | 1.81E-20 |
| CTC-296K1.4 | ENSG00000267405.1  | 0.1     | 8.247   | -3.071 | 5.25E-37 |
| MAP1B       | ENSG00000131711.14 | 1.42    | 19.368  | -3.073 | 4.89E-22 |
| WISP2       | ENSG00000064205.10 | 1.135   | 16.979  | -3.074 | 1.06E-12 |
| JAM3        | ENSG00000166086.12 | 3.51    | 37.022  | -3.076 | 1.15E-21 |
| RBM24       | ENSG00000112183.14 | 0.19    | 9.061   | -3.08  | 1.84E-40 |
| NR4A3       | ENSG00000119508.17 | 0.85    | 14.671  | -3.082 | 1.38E-23 |
| NEGR1       | ENSG00000172260.13 | 0.32    | 10.215  | -3.087 | 2.23E-37 |
| DIO3OS      | ENSG00000258498.6  | 0.765   | 14.044  | -3.091 | 3.17E-21 |
| ITGA8       | ENSG00000077943.7  | 0.74    | 13.827  | -3.091 | 9.22E-41 |
| TPM2        | ENSG00000198467.13 | 111.816 | 963.061 | -3.095 | 1.83E-13 |
| DDR2        | ENSG00000162733.16 | 1.55    | 20.862  | -3.1   | 2.89E-19 |
| RASL12      | ENSG00000103710.10 | 1.965   | 24.725  | -3.117 | 9.22E-24 |
| IGFBP5      | ENSG00000115461.4  | 22.485  | 202.79  | -3.117 | 1.02E-09 |
| FAM129A     | ENSG00000135842.16 | 4.55    | 47.335  | -3.122 | 5.57E-20 |
| IL33        | ENSG00000137033.11 | 2.125   | 26.263  | -3.125 | 4.82E-10 |
| BOC         | ENSG00000144857.14 | 2.1     | 26.438  | -3.146 | 3.68E-18 |
| ASB5        | ENSG00000164122.8  | 0.02    | 8.039   | -3.148 | 1.68E-30 |
| PDE2A       | ENSG00000186642.15 | 1.535   | 21.465  | -3.148 | 3.41E-31 |
| RASGRP2     | ENSG00000068831.18 | 1.97    | 25.476  | -3.156 | 3.29E-19 |
| HSD17B6     | ENSG00000025423.11 | 2.345   | 28.865  | -3.158 | 1.92E-19 |
| SFRP1       | ENSG00000104332.11 | 0.715   | 14.315  | -3.159 | 2.80E-14 |
| AC002398.12 | ENSG00000267328.1  | 0.485   | 12.323  | -3.165 | 3.63E-28 |
| OLFM1       | ENSG00000130558.18 | 0.97    | 16.665  | -3.165 | 2.46E-21 |
| COL14A1     | ENSG00000187955.11 | 4.815   | 51.33   | -3.17  | 2.84E-18 |
| TPSB2       | ENSG00000197253.13 | 9.095   | 90.252  | -3.176 | 3.78E-12 |
| ADAMTS9-AS1 | ENSG00000241158.5  | 0.12    | 9.147   | -3.18  | 9.70E-49 |

|               |                    |        |         |        |          |
|---------------|--------------------|--------|---------|--------|----------|
| TPSAB1        | ENSG00000172236.16 | 9.294  | 92.323  | -3.18  | 4.17E-12 |
| ABCA8         | ENSG00000141338.13 | 0.32   | 10.982  | -3.182 | 1.57E-36 |
| F10           | ENSG00000126218.11 | 0.485  | 12.583  | -3.193 | 2.24E-48 |
| SOD3          | ENSG00000109610.5  | 11.13  | 110.068 | -3.195 | 5.05E-11 |
| ZBTB16        | ENSG00000109906.13 | 0.23   | 10.667  | -3.246 | 2.56E-37 |
| EFEMP1        | ENSG00000115380.18 | 7.9    | 83.536  | -3.248 | 4.61E-07 |
| RBPMS2        | ENSG00000166831.8  | 2.24   | 29.965  | -3.257 | 2.27E-21 |
| PDZRN3        | ENSG00000121440.14 | 2.11   | 28.924  | -3.266 | 1.10E-20 |
| ACACB         | ENSG00000076555.15 | 1.51   | 23.227  | -3.271 | 1.08E-32 |
| MAOB          | ENSG00000069535.13 | 1.26   | 20.883  | -3.275 | 1.79E-19 |
| PLAC9         | ENSG00000189129.13 | 2.995  | 37.871  | -3.282 | 6.92E-25 |
| HLF           | ENSG00000108924.13 | 0.16   | 10.354  | -3.291 | 1.81E-64 |
| FBLN5         | ENSG00000140092.14 | 7.33   | 82.414  | -3.324 | 1.11E-18 |
| MSRB3         | ENSG00000174099.10 | 3.095  | 40.04   | -3.325 | 2.91E-19 |
| KCNMB1        | ENSG00000145936.8  | 0.68   | 15.864  | -3.327 | 1.58E-28 |
| TCEAL2        | ENSG00000184905.8  | 0.205  | 11.184  | -3.338 | 2.27E-25 |
| RGS2          | ENSG00000116741.7  | 21.04  | 222.767 | -3.344 | 1.53E-19 |
| FGFR1         | ENSG00000077782.19 | 6.34   | 73.753  | -3.348 | 1.74E-14 |
| FAM46B        | ENSG00000158246.7  | 1.415  | 23.642  | -3.351 | 3.13E-17 |
| CRTAC1        | ENSG00000095713.13 | 0.655  | 15.903  | -3.352 | 5.31E-03 |
| GPX3          | ENSG00000211445.11 | 26.404 | 280.828 | -3.362 | 4.81E-12 |
| C11orf96      | ENSG00000187479.5  | 15.18  | 165.496 | -3.363 | 4.74E-18 |
| RCAN2         | ENSG00000172348.14 | 2.3    | 33.552  | -3.388 | 8.80E-32 |
| MRV11         | ENSG00000072952.18 | 2.28   | 33.434  | -3.392 | 9.59E-24 |
| PID1          | ENSG00000153823.18 | 0.785  | 17.832  | -3.399 | 3.12E-34 |
| BHMT2         | ENSG00000132840.9  | 0.305  | 12.776  | -3.4   | 3.75E-45 |
| PPP1R12B      | ENSG00000077157.20 | 5.015  | 63.375  | -3.42  | 7.54E-29 |
| DUSP1         | ENSG00000120129.5  | 69.896 | 760.47  | -3.425 | 2.73E-18 |
| AOX1          | ENSG00000138356.13 | 0.305  | 13.038  | -3.427 | 2.31E-37 |
| LYVE1         | ENSG00000133800.8  | 0.635  | 16.631  | -3.431 | 2.43E-27 |
| MYOC          | ENSG00000034971.14 | 0.03   | 10.138  | -3.435 | 6.82E-57 |
| RAI2          | ENSG00000131831.17 | 1.685  | 28.125  | -3.439 | 1.94E-29 |
| LIMS2         | ENSG00000072163.18 | 8.54   | 103.766 | -3.457 | 7.56E-24 |
| RP11-166D19.1 | ENSG00000255248.6  | 1.59   | 27.552  | -3.463 | 1.54E-23 |
| PRAC1         | ENSG00000159182.4  | 0      | 10.075  | -3.469 | 5.42E-16 |
| PSD           | ENSG00000059915.16 | 1.895  | 31.3    | -3.48  | 8.11E-26 |
| MYOCD         | ENSG00000141052.17 | 0.165  | 12.018  | -3.482 | 2.94E-43 |
| SERPINA3      | ENSG00000273259.2  | 2.07   | 33.31   | -3.482 | 1.10E-07 |
| HSPB8         | ENSG00000152137.6  | 14.615 | 174.811 | -3.493 | 2.82E-15 |
| ABI3BP        | ENSG00000154175.16 | 2.005  | 32.953  | -3.498 | 1.97E-24 |
| CADM3         | ENSG00000162706.12 | 0.105  | 11.514  | -3.501 | 8.60E-31 |
| DTNA          | ENSG00000134769.21 | 1.33   | 25.437  | -3.504 | 2.24E-22 |
| CILP          | ENSG00000138615.5  | 0.295  | 13.799  | -3.515 | 2.52E-15 |
| VIT           | ENSG00000205221.12 | 0.03   | 10.841  | -3.523 | 3.93E-44 |

|            |                     |         |          |        |          |
|------------|---------------------|---------|----------|--------|----------|
| CNTN1      | ENSG00000018236.14  | 0.525   | 16.539   | -3.524 | 1.30E-17 |
| AOC3       | ENSG000000131471.6  | 6.04    | 80.234   | -3.528 | 3.49E-23 |
| ACKR1      | ENSG000000213088.9  | 3.635   | 53.288   | -3.55  | 8.91E-17 |
| CLCA4      | ENSG00000016602.9   | 1.425   | 27.402   | -3.55  | 8.36E-03 |
| PODN       | ENSG000000174348.13 | 5.39    | 73.868   | -3.55  | 7.45E-13 |
| AP000892.6 | ENSG000000280143.1  | 3.37    | 50.678   | -3.564 | 3.66E-20 |
| PPP1R14A   | ENSG000000167641.10 | 8.07    | 106.635  | -3.569 | 3.41E-21 |
| CACNA1H    | ENSG000000196557.10 | 1.955   | 34.262   | -3.577 | 2.69E-25 |
| ANGPTL1    | ENSG000000116194.12 | 0.21    | 13.816   | -3.614 | 2.08E-26 |
| MRGPRF     | ENSG000000172935.8  | 2.795   | 45.468   | -3.614 | 9.93E-22 |
| SHH        | ENSG000000164690.7  | 0.38    | 15.97    | -3.62  | 1.69E-03 |
| PDLIM3     | ENSG000000154553.13 | 10.18   | 137.851  | -3.635 | 7.62E-14 |
| SMOC2      | ENSG000000112562.18 | 4.485   | 67.174   | -3.636 | 2.65E-17 |
| TAGLN      | ENSG000000149591.16 | 216.158 | 2748.266 | -3.662 | 1.54E-13 |
| MUSTN1     | ENSG000000272573.5  | 1.25    | 27.505   | -3.663 | 1.38E-28 |
| OGN        | ENSG000000106809.10 | 0.14    | 13.47    | -3.666 | 1.42E-33 |
| PKDCC      | ENSG000000162878.12 | 2.03    | 37.542   | -3.669 | 3.25E-14 |
| PLN        | ENSG000000198523.5  | 1.02    | 24.689   | -3.669 | 2.32E-19 |
| ADAMTS1    | ENSG000000154734.14 | 7.21    | 104.672  | -3.686 | 3.47E-27 |
| APOD       | ENSG000000189058.8  | 9.33    | 132.422  | -3.691 | 2.01E-08 |
| HPSE2      | ENSG000000172987.12 | 0.14    | 13.848   | -3.703 | 3.80E-25 |
| ITIH5      | ENSG000000123243.14 | 2.645   | 46.658   | -3.709 | 1.75E-30 |
| PRUNE2     | ENSG000000106772.17 | 0.825   | 23.325   | -3.736 | 3.57E-25 |
| SPON1      | ENSG000000262655.3  | 2.385   | 44.195   | -3.739 | 2.21E-16 |
| HAND2-AS1  | ENSG000000237125.8  | 0.18    | 14.838   | -3.747 | 6.84E-38 |
| CES1       | ENSG000000198848.12 | 5.175   | 82.335   | -3.755 | 1.66E-09 |
| ADCY5      | ENSG000000173175.14 | 0.585   | 20.451   | -3.758 | 1.44E-31 |
| ACTA2      | ENSG000000107796.12 | 138.942 | 1908.005 | -3.77  | 2.17E-16 |
| SDPR       | ENSG000000168497.4  | 1.64    | 35.07    | -3.772 | 2.30E-33 |
| CRYAB      | ENSG000000109846.7  | 12.56   | 185.324  | -3.78  | 2.63E-19 |
| FOSB       | ENSG000000125740.13 | 13.27   | 195.293  | -3.782 | 6.74E-13 |
| LMO3       | ENSG00000048540.14  | 0.715   | 22.971   | -3.805 | 1.03E-23 |
| SRPX       | ENSG000000101955.14 | 4.445   | 75.285   | -3.808 | 1.51E-18 |
| FXYP6      | ENSG000000137726.15 | 5.475   | 90.803   | -3.826 | 1.50E-17 |
| ATP1A2     | ENSG00000018625.14  | 0.12    | 15.182   | -3.853 | 6.82E-48 |
| CHRD1      | ENSG000000101938.14 | 0.15    | 15.812   | -3.87  | 2.94E-27 |
| ACTA2-AS1  | ENSG000000180139.11 | 0.45    | 20.36    | -3.881 | 1.73E-29 |
| MIR143HG   | ENSG000000249669.7  | 0.4     | 19.681   | -3.885 | 1.53E-42 |
| PLA2G2A    | ENSG000000188257.10 | 14.554  | 232.27   | -3.907 | 2.49E-06 |
| MYL9       | ENSG000000101335.9  | 115.76  | 1758.28  | -3.913 | 7.50E-17 |
| FOXF1      | ENSG000000103241.6  | 2.025   | 44.84    | -3.922 | 1.64E-31 |
| DCN        | ENSG00000011465.16  | 81.433  | 1251.939 | -3.926 | 5.18E-12 |
| LINC01082  | ENSG000000269186.1  | 0.98    | 29.104   | -3.926 | 2.90E-38 |
| C16orf89   | ENSG000000153446.15 | 0.51    | 23.079   | -3.995 | 2.24E-41 |



|              |                    |        |          |        |          |
|--------------|--------------------|--------|----------|--------|----------|
| NR4A1        | ENSG00000123358.19 | 27.059 | 447.921  | -4     | 1.56E-21 |
| FABP4        | ENSG00000170323.8  | 10.09  | 176.791  | -4.003 | 1.59E-04 |
| NCAM1        | ENSG00000149294.16 | 0.3    | 20.054   | -4.017 | 2.04E-31 |
| SGCA         | ENSG00000108823.15 | 0.945  | 30.645   | -4.024 | 8.03E-25 |
| SPARCL1      | ENSG00000152583.12 | 26.215 | 444.704  | -4.034 | 1.61E-25 |
| SORBS2       | ENSG00000154556.17 | 3.93   | 83.912   | -4.106 | 1.52E-24 |
| ADAM33       | ENSG00000149451.17 | 0.725  | 28.715   | -4.107 | 1.99E-35 |
| HIF3A        | ENSG00000124440.15 | 0.25   | 21.109   | -4.145 | 1.87E-33 |
| RBFOX3       | ENSG00000167281.18 | 0.06   | 17.938   | -4.159 | 8.35E-43 |
| ADGRD1       | ENSG00000111452.12 | 0.45   | 25.042   | -4.167 | 9.92E-35 |
| MAMDC2       | ENSG00000165072.9  | 0.42   | 24.536   | -4.169 | 7.20E-34 |
| PTGIS        | ENSG00000124212.5  | 1.61   | 46.163   | -4.176 | 4.52E-17 |
| PTGS1        | ENSG00000095303.14 | 3.52   | 80.949   | -4.18  | 1.01E-19 |
| MFAP4        | ENSG00000166482.11 | 16.469 | 318.819  | -4.194 | 1.63E-16 |
| TNS1         | ENSG00000079308.16 | 5.69   | 122.515  | -4.207 | 1.17E-25 |
| HAND2        | ENSG00000164107.8  | 0.64   | 30.054   | -4.243 | 7.94E-26 |
| PCOLCE2      | ENSG00000163710.7  | 1.53   | 49.545   | -4.32  | 2.78E-24 |
| CLEC3B       | ENSG00000163815.5  | 3.67   | 92.702   | -4.327 | 2.67E-40 |
| TNXB         | ENSG00000168477.17 | 2.27   | 65.992   | -4.357 | 7.40E-31 |
| MYLK         | ENSG00000065534.18 | 10.945 | 246.977  | -4.376 | 2.41E-21 |
| FXYD1        | ENSG00000266964.5  | 1.78   | 57.375   | -4.392 | 9.15E-35 |
| RP11-394O4.5 | ENSG00000269936.3  | 1.25   | 47.41    | -4.427 | 2.71E-25 |
| FAM107A      | ENSG00000168309.16 | 0.62   | 34.484   | -4.453 | 1.60E-51 |
| DPT          | ENSG00000143196.4  | 1.18   | 49.038   | -4.521 | 4.52E-21 |
| PDK4         | ENSG00000004799.7  | 3.055  | 92.905   | -4.533 | 5.94E-31 |
| HSPB7        | ENSG00000173641.17 | 0.93   | 44.778   | -4.568 | 1.68E-18 |
| PRELP        | ENSG00000188783.5  | 1.385  | 55.97    | -4.578 | 8.66E-28 |
| CASQ2        | ENSG00000118729.11 | 0.155  | 26.838   | -4.591 | 1.92E-26 |
| P2RX1        | ENSG00000108405.3  | 0.435  | 33.969   | -4.607 | 1.87E-31 |
| SORBS1       | ENSG00000095637.20 | 2.485  | 84.846   | -4.623 | 8.52E-26 |
| CFD          | ENSG00000197766.7  | 9.755  | 336.846  | -4.973 | 1.06E-31 |
| FENDRR       | ENSG00000268388.5  | 1.375  | 73.684   | -4.975 | 3.04E-33 |
| FLNC         | ENSG00000128591.15 | 1.36   | 73.482   | -4.98  | 4.65E-24 |
| C2orf40      | ENSG00000119147.9  | 0.25   | 46.439   | -5.246 | 1.42E-40 |
| SYNPO2       | ENSG00000172403.10 | 1.67   | 102.465  | -5.276 | 6.78E-31 |
| CCL14        | ENSG00000276409.4  | 1.9    | 111.638  | -5.279 | 1.92E-26 |
| SCARA5       | ENSG00000168079.16 | 0.175  | 45.04    | -5.292 | 1.81E-64 |
| ACTG2        | ENSG00000163017.13 | 29.733 | 1316.919 | -5.422 | 4.23E-18 |
| LMOD1        | ENSG00000163431.12 | 2.76   | 166.784  | -5.48  | 1.25E-26 |
| PII6         | ENSG00000164530.13 | 0.165  | 51.662   | -5.498 | 1.51E-47 |
| PGM5         | ENSG00000154330.12 | 1.15   | 105.226  | -5.627 | 1.08E-32 |
| FHL1         | ENSG00000022267.16 | 6.415  | 367.295  | -5.634 | 7.94E-26 |
| SYNM         | ENSG00000182253.14 | 2.185  | 159.063  | -5.651 | 4.61E-30 |
| PCP4         | ENSG00000183036.10 | 0.965  | 112.483  | -5.852 | 8.22E-17 |

|          |                    |        |          |        |          |
|----------|--------------------|--------|----------|--------|----------|
| CNN1     | ENSG00000130176.7  | 11.275 | 739.783  | -5.915 | 1.28E-20 |
| C7       | ENSG00000112936.18 | 0.645  | 123.426  | -6.241 | 1.71E-28 |
| HSPB6    | ENSG00000004776.11 | 3.43   | 334.718  | -6.244 | 1.34E-29 |
| ADH1B    | ENSG00000196616.12 | 0.275  | 107.653  | -6.413 | 1.60E-44 |
| PGM5-AS1 | ENSG00000224958.5  | 0.08   | 110.268  | -6.687 | 1.41E-41 |
| MYH11    | ENSG00000133392.16 | 9.785  | 1543.391 | -7.162 | 6.81E-24 |
| ACTC1    | ENSG00000159251.6  | 0.425  | 228.136  | -7.329 | 4.94E-19 |
| DES      | ENSG00000175084.11 | 9.275  | 2026.227 | -7.624 | 2.27E-16 |

---
